# Supplementary material for: Organoaluminum cations for carbonyl activation
Source: Royal Society of Chemistry journal article supplement (doi:10.1039/c9cc08272g), 2019-01-01
Supplement: c9cc08272g1.pdf [file c9cc08272g1.pdf]

## Supporting Information

for

## Organoaluminum Cation for Carbonyl Activation

Ramkumar Kannan,<sup>[a]</sup> Raju Chammenahalli,<sup>[a]</sup> Sandeep Kumar,<sup>[b]</sup> Alex P. Andrews,<sup>[a]</sup> Eluvathingal D. Jemmis,<sup>[b]</sup> and Ajay Venugopal<sup>\*[a]</sup>

<sup>[a]</sup> School of Chemistry, Indian Institute of Science Education and Research Thiruvananthapuram, Vithura, Thiruvananthapuram 695551, India.

E-mail: venugopal@iisertvm.ac.in

<sup>[b]</sup> Department of Inorganic and Physical Chemistry, Indian Institute of Science, Bangalore 560012, India.

### Contents

1. General Methods and Synthetic Procedures and Characterization
2. Catalytic Aldehyde Dimerization (Tischenko Reaction)
3. Catalytic Hydrosilylation of Ketones
4. Hydroboration and Hydrostannylation of 4,4'-dimethylbenzophenone
5. Other NMR Spectra
6. Crystallographic data
7. Computational Details

## GENERAL METHODS AND SYNTHETIC PROCEDURES AND CHARACTERIZATION

General Methods: All manipulations were performed under argon atmosphere using standard Schlenk and glove-box techniques.<sup>[1]</sup> The solvents used for syntheses and for NMR experiments were dried, distilled and degassed prior to use by standard methods.<sup>[2]</sup>  $[(\text{NMe}_2)\text{C}_6\text{H}_4\text{Li}]$ <sup>[3]</sup> and  $[(\text{CH}_3\text{CN})_2\text{Ag}][\text{B}(\text{C}_6\text{H}_3\text{Cl}_2)_4]$  were prepared according to the literature procedure.<sup>[4]</sup> Commercially available anhydrous  $\text{AlCl}_3$  and  $\text{MesMgBr}$  (1M THF solution) were used without any further purification. Aldehydes and ketones were dried with appropriate drying agents before use.  $\text{Et}_3\text{SiH}$ ,  $\text{PhSiH}_3$ ,  $\text{HBpin}$  and tributyltinhydride were used without any further purification. NMR measurements were performed on Bruker 500 MHz spectrometer. The chemical shifts ( $\delta$  ppm) in  $^1\text{H}$  and  $^{13}\text{C}$  NMR spectra were referenced to the residual signals of the deuterated solvents.  $^{19}\text{F}$  &  $^{31}\text{P}$  NMR spectra were referenced to  $\text{CFCl}_3$  and  $\text{H}_3\text{PO}_4$  (85%) respectively. The chemical shifts ( $\delta$  ppm) in  $^{11}\text{B}$  NMR spectra were referenced to  $\text{NaBH}_4$  in  $\text{D}_2\text{O}$ . Analytically pure compounds for elemental analysis were obtained by repeated crystallisation of the products. Elemental analyses were performed on Elemental Vario Micro Cube.

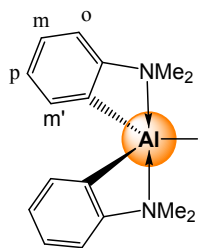

**Compound 1:** A diethyl ether solution of  $[(\text{NMe}_2)_6\text{C}_6\text{H}_4\text{Li}]$  (0.6g, 4.72mmol) was added dropwise to a diethyl ether solution of aluminum chloride (0.31g, 2.36mmol)  $-70^\circ\text{C}$ . The reaction mixture was gradually warmed up to ambient temperature and stirred for two hours. It was filtered and concentrated to 10 ml. Colorless crystals precipitated from this solution at  $0^\circ\text{C}$ . Yield: 0.5 g (70%); **Elemental analysis** for  $\text{C}_{16}\text{H}_{20}\text{N}_2\text{Cl}_1\text{Al}_1$ : C, 63.46; H, 6.65; N, 9.25. Found: C, 63.2; H, 6.63; N, 9.24;  **$^1\text{H NMR}$**  ( $\text{CD}_2\text{Cl}_2$ , 500 MHz):  $\delta$  2.97 (s, 6H,  $\text{NMe}_2$ ), 7.26 (m, 2H, *o,m*- $\text{C}_6\text{H}_4$ ), 7.36 (t, 1H, *p*- $\text{C}_6\text{H}_4$ ) ( $^3J_{\text{HH}} = 6.3$  Hz), 7.61 (d, 1H, *m'*- $\text{C}_6\text{H}_4$ ) ( $^3J_{\text{HH}} = 5$  Hz);  **$^{13}\text{C NMR}$**  ( $\text{CD}_2\text{Cl}_2$ , 126 MHz): 48.2 (s,  $\text{NMe}_2$ ), 117.2(s, *o*- $\text{C}_6\text{H}_4$ ), 127.8 (s, *m*- $\text{C}_6\text{H}_4$ ), 129 (s,  $\text{C}_6\text{H}_4\text{-N}$ ), 129.9(s, *p*- $\text{C}_6\text{H}_4$ ), 137(s, *m'*- $\text{C}_6\text{H}_4$ ), 159.8(s,  $\text{C}_6\text{H}_4\text{-Al}$ ).

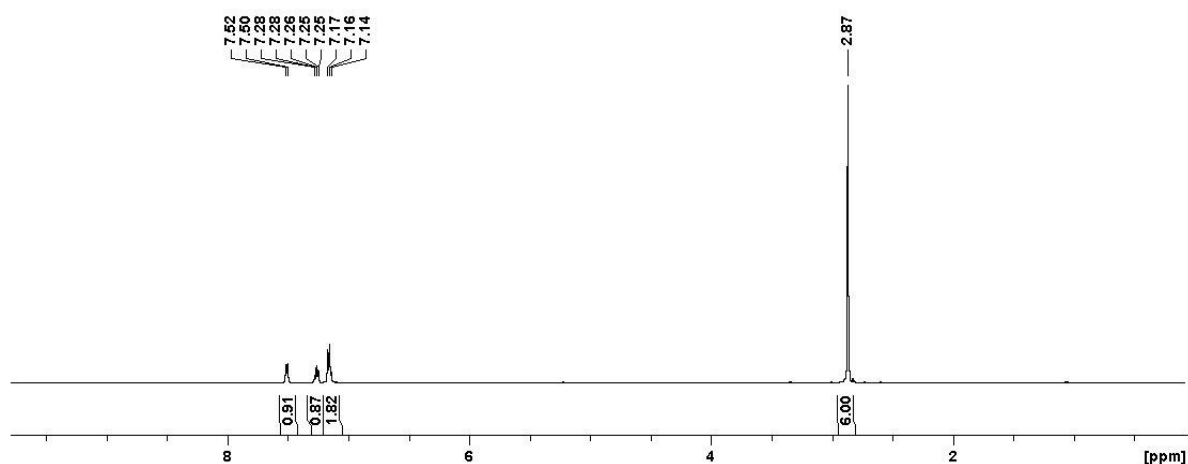

**Figure S1:**  $^1\text{H NMR}$  spectrum ( $[\text{CD}_2\text{Cl}_2]$ , 500 MHz) of compound 1.

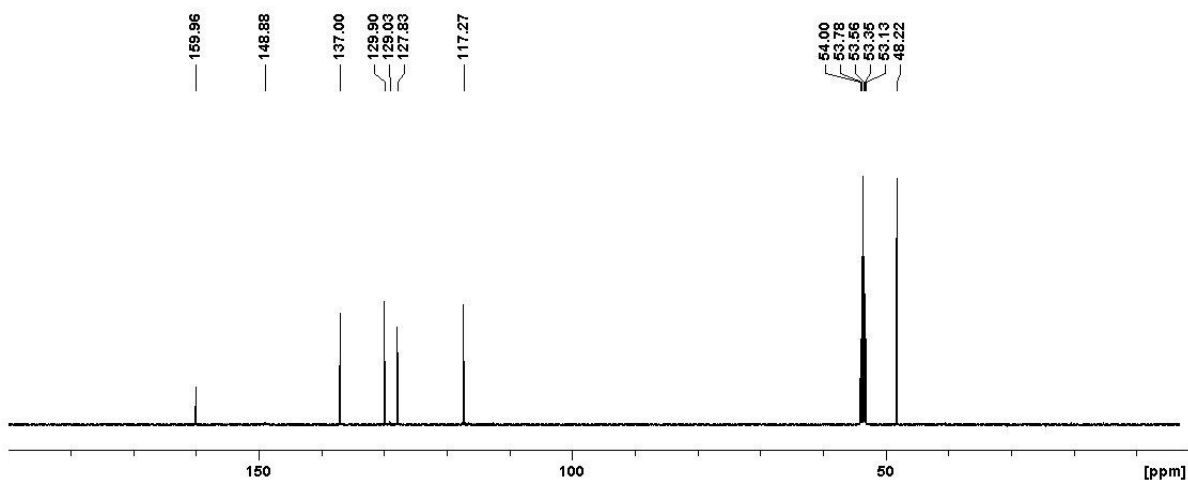

**Figure S2:**  $^{13}\text{C NMR}$  spectrum ( $[\text{CD}_2\text{Cl}_2]$ , 126 MHz) of compound 1.

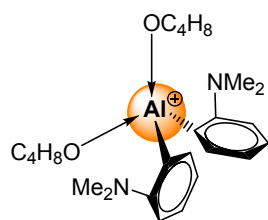

**Compound 2:** A solution of **1** (0.08 g, 0.26 mmol) in tetrahydrofuran was added dropwise to a solution of  $[(\text{CH}_3\text{CN})_2\text{Ag}][\text{B}(\text{C}_6\text{H}_3\text{Cl}_2)_4]$  (0.23 g, 0.26 mmol) in tetrahydrofuran at  $-78^\circ\text{C}$ . The reaction temperature was gradually allowed to attain ambient temperature and stirred for few minutes. The reaction mixture was filtered and the filtrate was concentrated layered with 15 mL n-hexane to obtain colorless crystals at  $0^\circ\text{C}$ . Yield 0.23g (81%); Elemental analysis for  $\text{C}_{52}\text{H}_{56}\text{N}_2\text{O}_3\text{Cl}_8\text{B}_1\text{Al}_1$ : C, 57.91; H, 5.23; N, 2.59. Found: C, 57.64; H, 5.21; N, 2.58;  $^1\text{H NMR}$  ( $\text{CD}_2\text{Cl}_2$ , 500 MHz):  $\delta$  1.93 (t, 12H, *o*-THF), 2.91 (s, 12H,  $\text{NMe}_2$ ), 3.85 (t, 12H, *m*-THF), 6.99 (s, *p*- $\text{BAr}^{\text{Cl}}$ ), 7.04 (s, *o*- $\text{BAr}^{\text{Cl}}$ ), 7.34 (d, 2H, *o*- $\text{C}_6\text{H}_4$ ) ( $^3J_{\text{HH}} = 10\text{Hz}$ ), 7.4 (t, 2H, *m*- $\text{C}_6\text{H}_4$ ) ( $^3J_{\text{HH}} = 10\text{Hz}$ ), 7.52 (t, 2H, *p*- $\text{C}_6\text{H}_4$ ) ( $^3J_{\text{HH}} = 10\text{Hz}$ ), 7.63 (d, 2H, *m'*- $\text{C}_6\text{H}_4$ ) ( $^3J_{\text{HH}} = 5\text{Hz}$ );  $^{13}\text{C NMR}$  ( $\text{CD}_2\text{Cl}_2$ , 126 MHz):  $\delta$  25.5 (s, *m*-THF), 47.6 (s,  $\text{NMe}_2$ ), 70.8 (s, *o*-THF), 117.3 (s, *o*- $\text{C}_6\text{H}_4$ ), 123 (s, *p*- $\text{BAr}_4^{\text{Cl}}$ ), 129.5 (s, *m*- $\text{C}_6\text{H}_4$ ), 132.2 (s, *p*- $\text{C}_6\text{H}_4$ ), 132.9 (q, *i*- $\text{C}_6\text{H}_4\text{-N}$ ), 133.1 (s, *o*- $\text{BAr}_4^{\text{Cl}}$ ), 137.2 (s, *m'*- $\text{C}_6\text{H}_4$ ), 159.2 (s,  $\text{Al-C}_6\text{H}_4$ ), 164.6 (q, *i*- $\text{BAr}_4^{\text{Cl}}$ );  $^{11}\text{B NMR}$  ( $\text{CD}_2\text{Cl}_2$ , 160.5 MHz):  $\delta$  -6.93 (s,  $\text{BAr}_4^{\text{Cl}}$ ).

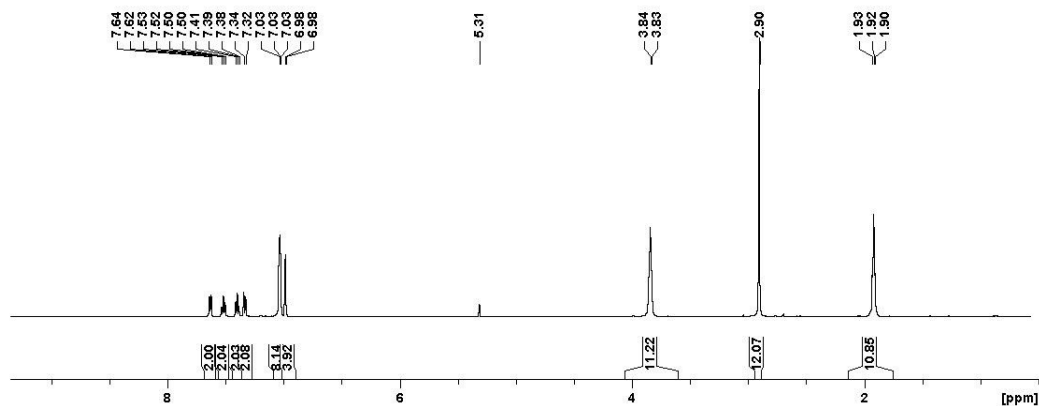

**Figure S3:**  $^1\text{H NMR}$  spectrum ( $[\text{CD}_2\text{Cl}_2]$ , 500 MHz) of compound **2**.

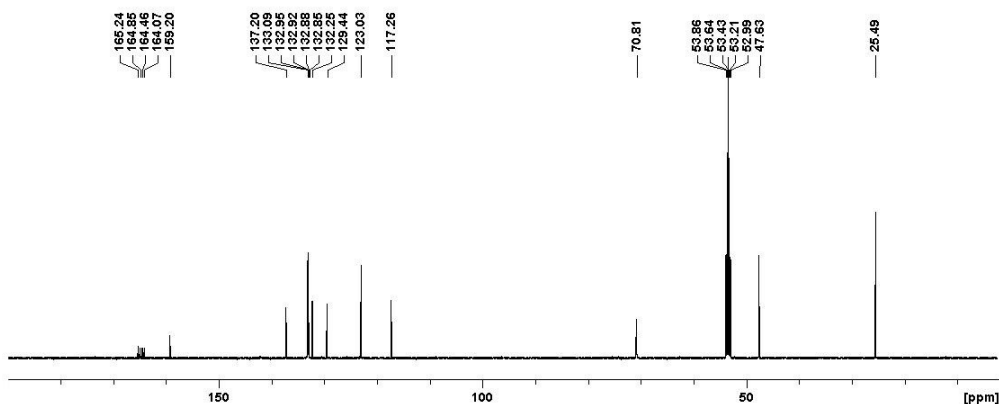

**Figure S4:**  $^{13}\text{C NMR}$  spectrum ( $[\text{CD}_2\text{Cl}_2]$ , 126 MHz) of compound **2**.

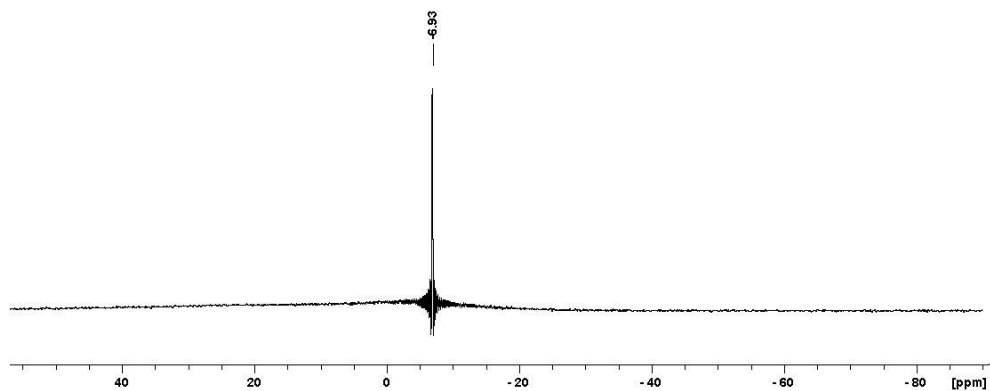

**Figure S5:**  $^{11}\text{B}$  NMR spectrum ( $[\text{CD}_2\text{Cl}_2]$ , 160.5 MHz) of compound **2**.

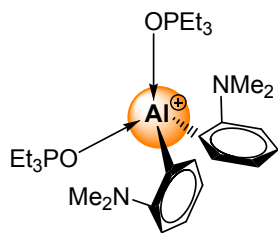

**Compound 3:** A solution of **2** (0.02 g, 0.018 mmol) in  $\text{CD}_2\text{Cl}_2$  was reacted with  $\text{OPEt}_3$  (0.005 g, 0.036 mmol) in an NMR tube fitted with a *J*-Young joint. The resulting solution was layered with *n*-hexane and allowed to stand overnight at  $0^\circ\text{C}$  to afford colorless crystals. Yield: 0.0172 g (82%); Elemental analysis for  $\text{C}_{52}\text{H}_{62}\text{P}_2\text{O}_2\text{N}_2\text{Cl}_6\text{B}_1\text{Al}_1$ : C, 55.25; H, 5.52; N, 2.47. Found: C, 54.92; H, 5.49; N, 2.45;  **$^1\text{H}$  NMR** ( $\text{CD}_2\text{Cl}_2$ , 500 MHz):  $\delta$  0.98 (m, 18H,  $\text{OPCH}_2\text{CH}_3$ ), 1.73 (m, 12H,  $\text{OPCH}_2\text{CH}_3$ ), 1.73 (m, 8H, Free *m*-THF), 2.51 (s, 12H,  $\text{NMe}_2$ ), 3.59 (t, 8H, Free *m*-THF), 6.88 (m, 4H, *o,m*- $\text{C}_6\text{H}_4$ ), 6.91 (s, *p*- $\text{BAR}^{\text{Cl}}$ ), 6.95 (s, *o*- $\text{BAR}^{\text{Cl}}$ ), 7.17 (t, 2H, *p*- $\text{C}_6\text{H}_4$ ) ( $^3J_{\text{HH}} = 10\text{Hz}$ ), 7.42 (t, 2H, *m'*- $\text{C}_6\text{H}_4$ ) ( $^3J_{\text{HH}} = 10\text{Hz}$ );  **$^{13}\text{C}$  NMR** ( $\text{CD}_2\text{Cl}_2$ , 126 MHz):  $\delta$  5 (s,  $\text{OPCH}_2\text{CH}_3$ ), 17.4, 18 (s,  $\text{OPCH}_2\text{CH}_3$ ), 25.6 (s, *m*-THF), 46.2 (s,  $\text{NMe}_2$ ), 67.7 (s, *o*-THF), 116.7 (s, *o*- $\text{C}_6\text{H}_4$ ), 122.2 (s, *m*- $\text{C}_6\text{H}_4$ ), 123 (s, *p*- $\text{BAR}_4^{\text{Cl}}$ ), 129.2 (s, *p*- $\text{C}_6\text{H}_4$ ), 132.8 (q, *i*- $\text{C}_6\text{H}_4$ -Al), 133.1 (s, *o*- $\text{BAR}_4^{\text{Cl}}$ ), 128.4 (s, *m*- $\text{C}_6\text{H}_4$ ), 137.9 (s, *m'*- $\text{C}_6\text{H}_4$ ), 161.4 (s, *i*- $\text{C}_6\text{H}_4\text{NMe}_2$ ), 164.8 (q, *i*- $\text{BAR}_4^{\text{Cl}}$ );  **$^{11}\text{B}$  NMR** ( $\text{CD}_2\text{Cl}_2$ , 160.5 MHz):  $\delta$  -6.93 (s,  $\text{BAR}_4^{\text{Cl}}$ );  **$^{31}\text{P}$  NMR** ( $\text{CD}_2\text{Cl}_2$ , 202.5 MHz):  $\delta$  75.45 (s,  $\text{OPCH}_2\text{CH}_3$ ).

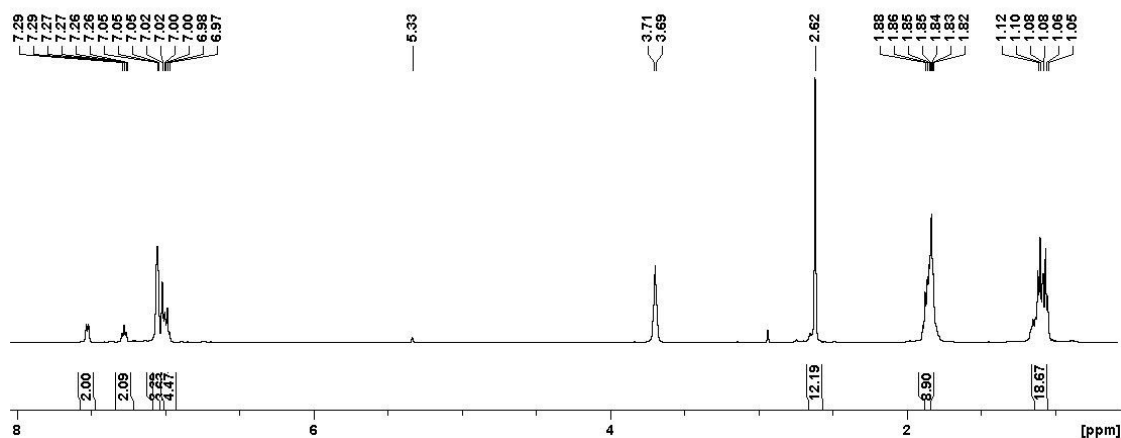

**Figure S6:**  $^1\text{H}$  NMR spectrum ( $[\text{CD}_2\text{Cl}_2]$ , 500 MHz) of compound **3**.

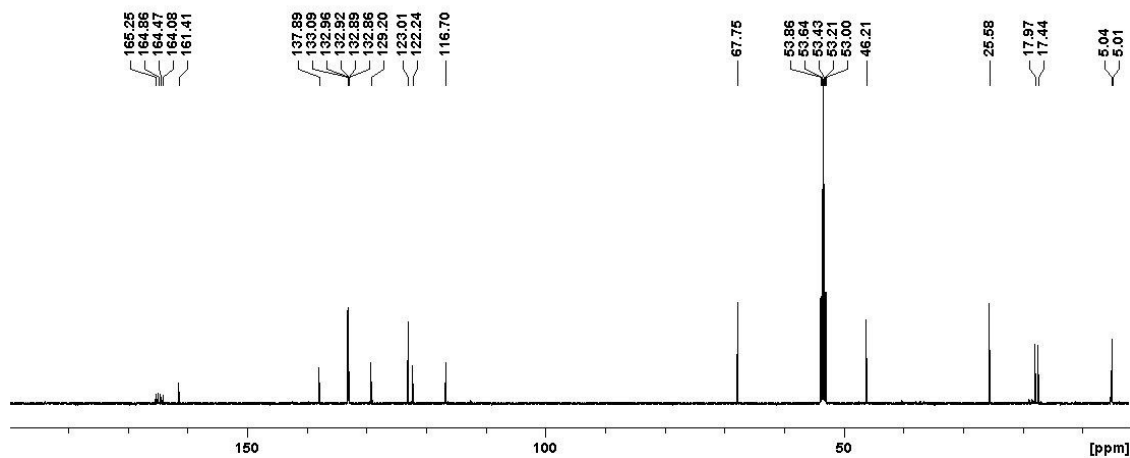

**Figure S7:**  $^{13}\text{C}$  NMR spectrum ( $[\text{CD}_2\text{Cl}_2]$ , 126 MHz) of compound **3**.

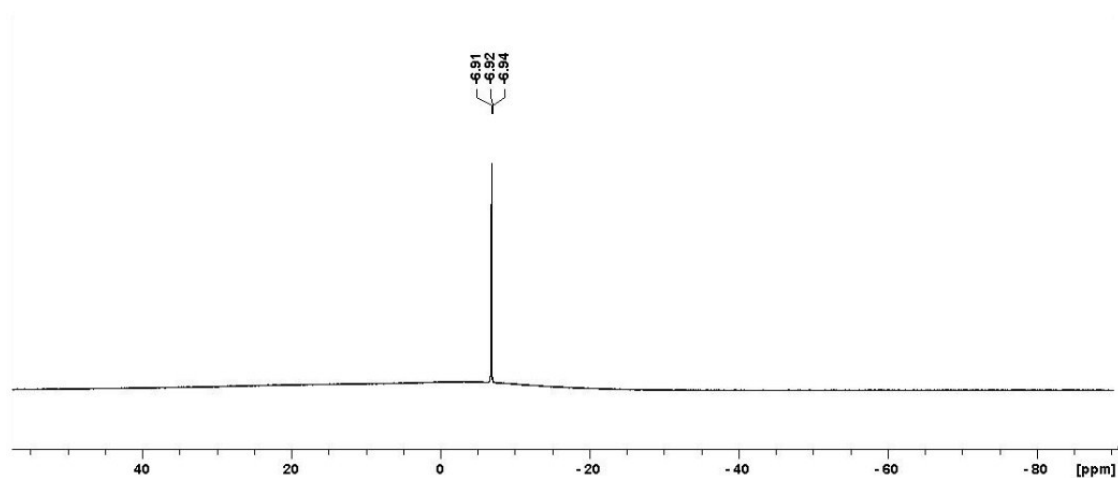

**Figure S8:**  $^{11}\text{B}$  NMR ( $[\text{CD}_2\text{Cl}_2]$ , 160.5 MHz) of compound **3**.

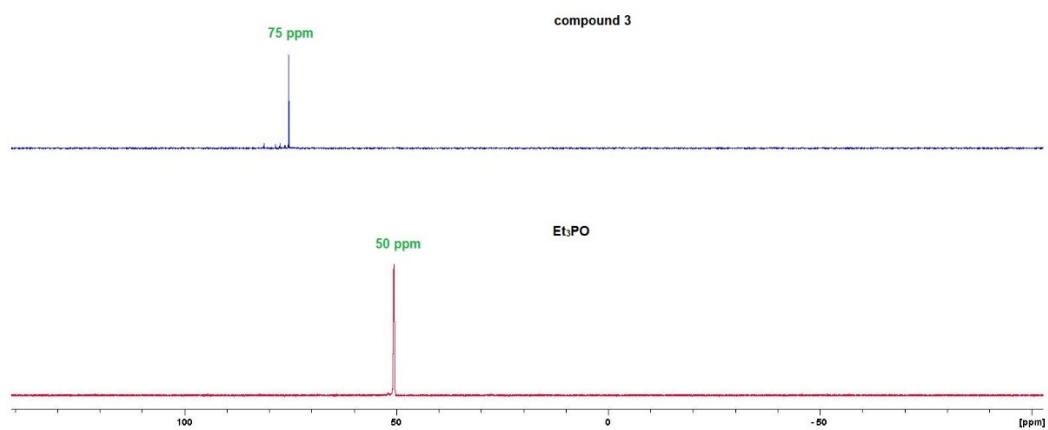

**Figure S9:** Stacked  $^{31}\text{P}$  NMR ( $[\text{CD}_2\text{Cl}_2]$ , 202 MHz) of compound Et<sub>3</sub>PO (below) and compound **3** (above).

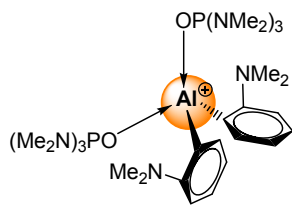

**Compound 4:** A solution of **2** (0.04 g, 0.037 mmol) in tetrahydrofuran was treated with  $\text{OP}(\text{NMe}_2)_3$  (25.8  $\mu\text{L}$ , 0.148 mmol). The reaction mixture was stirred for an hour and the resulting solution was layered with n-hexane to afford colorless crystals after 5 days. Yield: 0.036 g. (79.6 %); Elemental analysis for  $\text{C}_{52}\text{H}_{68}\text{P}_2\text{O}_2\text{N}_8\text{Cl}_8\text{B}_1\text{Al}_1$ : C, 51.17; H, 5.61; N, 9.18. Found: C, 50.78; H, 5.57; N, 9.16;  $^1\text{H NMR}$  ( $\text{CD}_2\text{Cl}_2$ , 500 MHz):  $\delta$  2.54 (s, 29H,  $\text{NMe}_2$ ,  $\text{OPNMe}_2$ ), 2.56 (s, 19H,  $\text{NMe}_2$ ,  $\text{OPNMe}_2$ ), 1.81 (m, 8H, Free *m*-THF), 3.67 (t, 8H, Free *m*-THF), 6.88 (t, 2H, *m*- $\text{C}_6\text{H}_4$ ) ( $^3J_{\text{HH}} = 5\text{Hz}$ ), 6.99 (s, *p*- $\text{BAR}_4^{\text{Cl}}$ ), 7.03 (m, *o*- $\text{BAR}_4^{\text{Cl}}$ ), 7.03 (m, 2H, *o*- $\text{C}_6\text{H}_4$ ), 7.23 (t, 2H, *p*- $\text{C}_6\text{H}_4$ ) ( $^3J_{\text{HH}} = 5\text{Hz}$ ), 7.54 (t, 2H, *m'*- $\text{C}_6\text{H}_4$ ) ( $^3J_{\text{HH}} = 5\text{Hz}$ );  $^{13}\text{C NMR}$  ( $\text{CD}_2\text{Cl}_2$ , 126 MHz):  $\delta$  25.6 (s, *m*-THF), 36.4 (s,  $\text{OPNMe}_2$ ), 46.1 (s,  $\text{NMe}_2$ ), 67.7 (s, *o*-THF), 112.4 (s, *m*- $\text{BAR}_4^{\text{Cl}}$ ), 117.1 (s, *o*- $\text{C}_6\text{H}_4$ ), 122.2 (s, *m*- $\text{C}_6\text{H}_4$ ), 123 (s, *p*- $\text{BAR}_4^{\text{Cl}}$ ), 128.8 (s, *p*- $\text{C}_6\text{H}_4$ ), 132.8 (q, *i*- $\text{C}_6\text{H}_4\text{-Al}$ ), 133 (s, *o*- $\text{BAR}_4^{\text{Cl}}$ ), 137.7 (s, *m'*- $\text{C}_6\text{H}_4$ ), 162.2 (s, *i*- $\text{C}_6\text{H}_4\text{NMe}_2$ ), 164.6 (q, *i*- $\text{BAR}_4^{\text{Cl}}$ );  $^{11}\text{B NMR}$  ( $\text{CD}_2\text{Cl}_2$ , 160.5 MHz):  $\delta$  -6.93 (s,  $\text{BAR}_4^{\text{Cl}}$ ).  $^{31}\text{P NMR}$  ( $\text{CD}_2\text{Cl}_2$ , 202.5 MHz):  $\delta$  24.1 (t,  $\text{OPNMe}_2$ ).

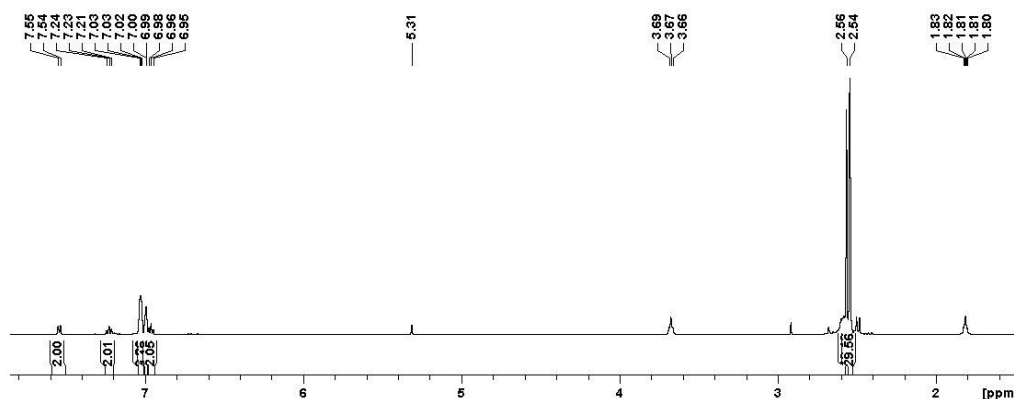

**Figure S10:**  $^1\text{H NMR}$  ( $[\text{CD}_2\text{Cl}_2]$ , 500 MHz) of compound **4**.

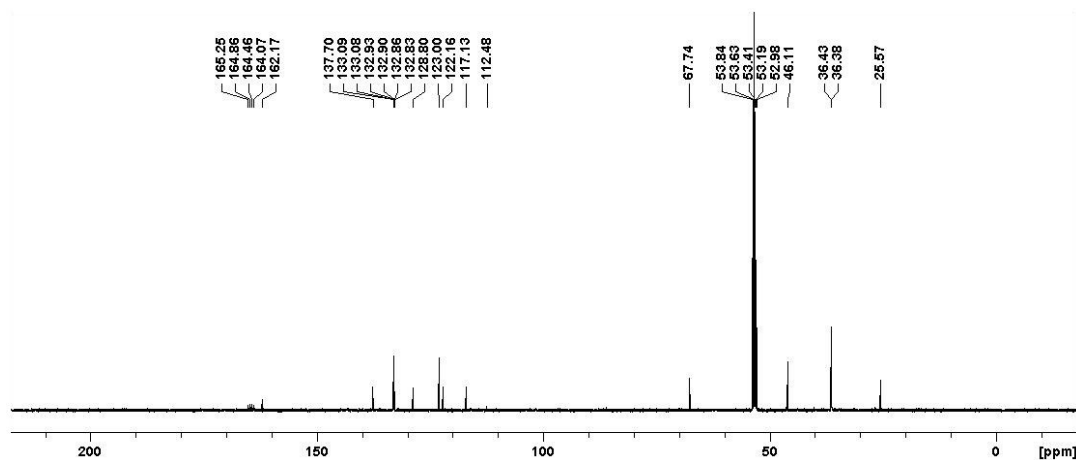

**Figure S11:**  $^{13}\text{C NMR}$  ( $[\text{CD}_2\text{Cl}_2]$ , 126 MHz) of compound **4**.



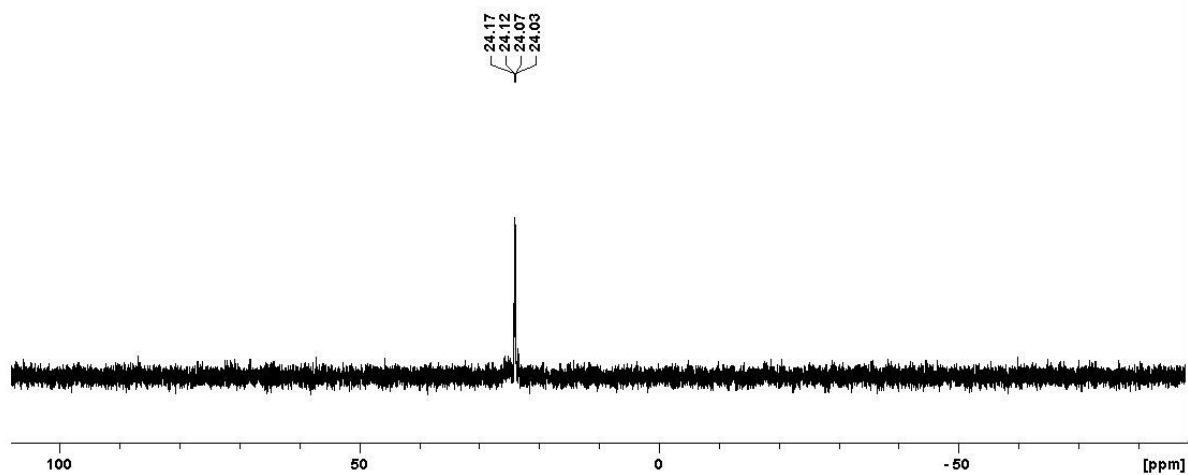

Figure S12: <sup>31</sup>P NMR ([CD<sub>2</sub>Cl<sub>2</sub>], 202 MHz) of compound 4.

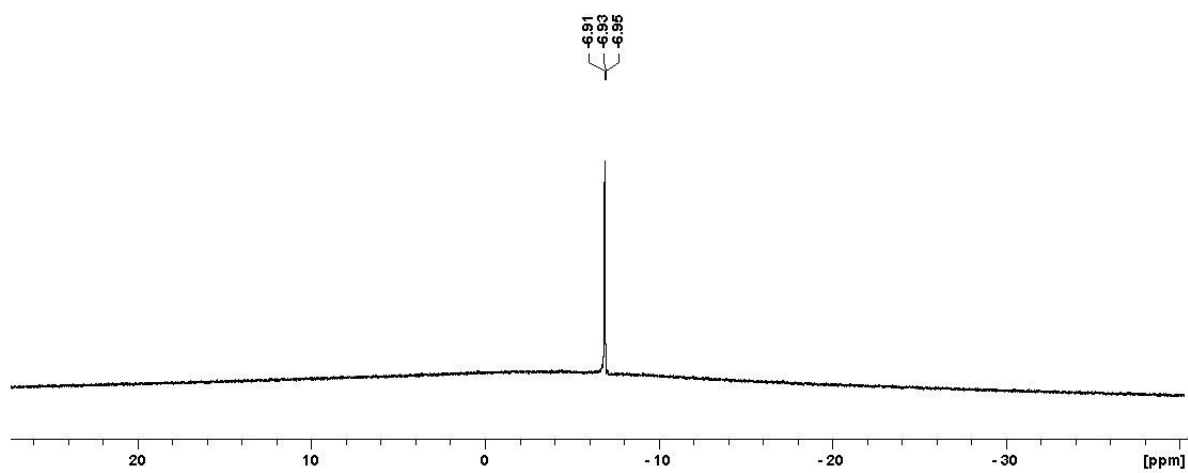

Figure S13: <sup>11</sup>B NMR ([CD<sub>2</sub>Cl<sub>2</sub>], 160.5 MHz) of compound 4.

## CATALYTIC ALDEHYDE DIMERIZATION (TISCHENKO REACTION)

**Typical reaction procedure:** Catalytic amount of **2** was introduced into a known volume of aldehyde and stirred 18 °C. The progress of the reaction was monitored by taking an aliquot of the reaction mixture and measuring <sup>1</sup>H NMR in C<sub>6</sub>D<sub>6</sub> at regular time intervals. Mesitylene was used as an internal standard to calculate the yield of the product.

**Table S1:** Summary of catalytic aldehyde dimerization. a) Solvent free neat reactions, b) reaction performed in 0.1 mL C<sub>6</sub>D<sub>6</sub>, c) Reaction performed in 0.4 mL C<sub>6</sub>D<sub>6</sub>.

| Substrate                                                                           | Catalyst (mol %) | Product                                                                              | TON  | TOF  | Yield (%)       |
|-------------------------------------------------------------------------------------|------------------|--------------------------------------------------------------------------------------|------|------|-----------------|
| 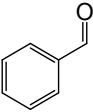   | 0.1              |    | 1000 | 2000 | 99 <sup>a</sup> |
|    | 0.5              |     | 800  | 1600 | 98 <sup>c</sup> |
|  | 0.5              |  | 200  | 6000 | 98 <sup>a</sup> |
|  | 0.5              |  | 200  | 600  | 99 <sup>a</sup> |
|  | 2                |  | 50   | 200  | 98 <sup>b</sup> |
|  | 5                |  | 19.2 | 38.4 | 96 <sup>c</sup> |

### Benzaldehyde dimerization:

**2** (0.005 g, 0.004 mmol), benzaldehyde (471.2  $\mu$ l, 4.63 mmol), mesitylene (215  $\mu$ l, 1.54 mmol).

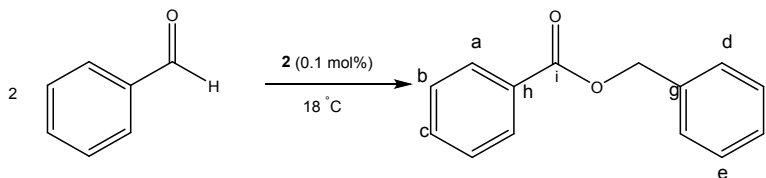

**Scheme S1:** Catalytic dimerization of benzaldehyde.

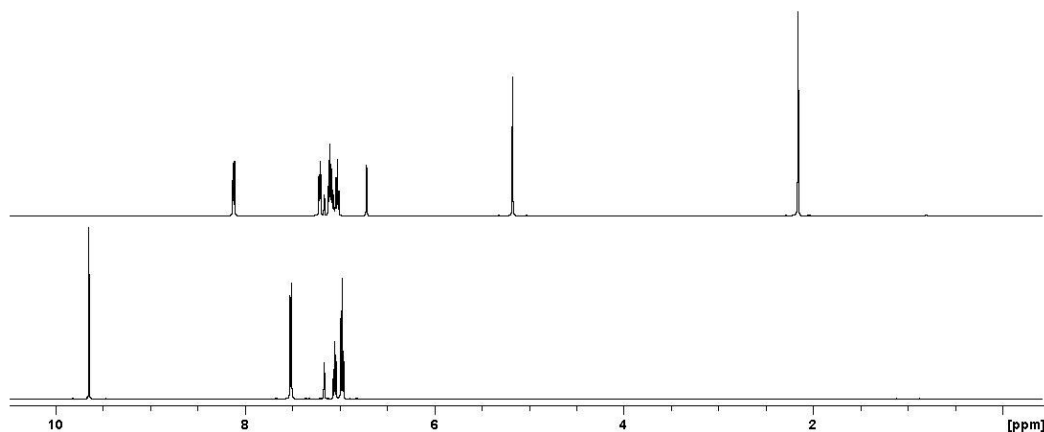

**Figure S14:** Stacking of  $^1\text{H}$  NMR spectra of benzaldehyde (bottom) and after (top) the product formation recorded in  $\text{C}_6\text{D}_6$  with internal reference (mesitylene).

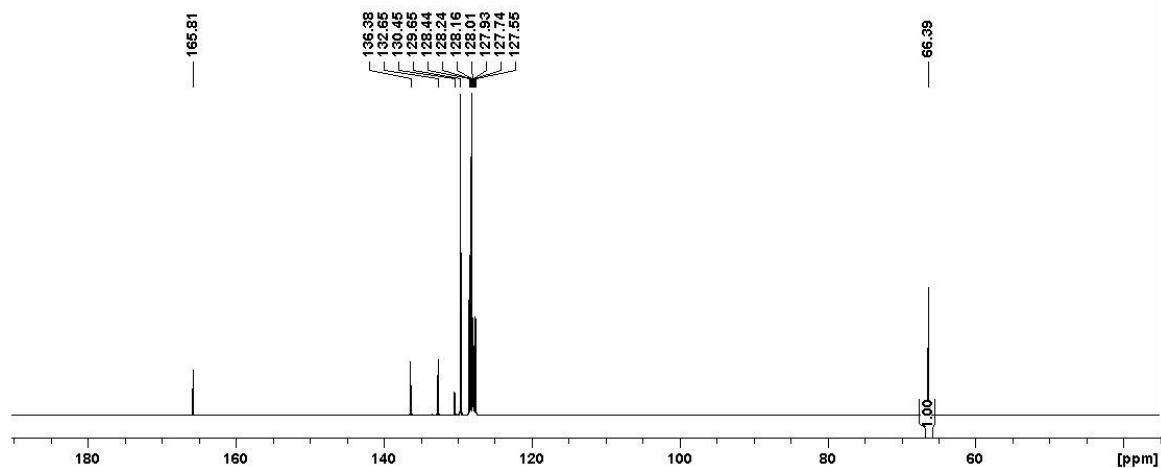

**Figure S15:**  $^{13}\text{C}$  NMR spectrum ( $[\text{C}_6\text{D}_6]$ , 126 MHz) of benzyl benzoate.

$^1\text{H}$  NMR ( $\text{C}_6\text{D}_6$ , 500 MHz):  $\delta$  5.17 (s, 2H,  $\text{OCH}_2$ ), 7.03 (t, 2H, *c,f*-CH) ( $^3J_{\text{HH}} = 5\text{Hz}$ ), 7.11 (m, 4H, *b,e*-CH), 7.21 (d, 2H, *d*-CH) ( $^3J_{\text{HH}} = 5\text{Hz}$ ), 8.1 (d, 2H, *a*-CH) ( $^3J_{\text{HH}} = 5\text{Hz}$ ). (**NMR Yield: 99 %**);  $^{13}\text{C}$  NMR ( $\text{C}_6\text{D}_6$ , 126 MHz):  $\delta$  66.3 (s,  $\text{OCH}_2$ ), 128.2 (s, *c,f*- $\text{C}_6\text{H}_5$ ), 128.1 (s, *d*- $\text{C}_6\text{H}_5$ ), 128.4 (s, *b*- $\text{C}_6\text{H}_5$ ), 129.6 (s, *a*- $\text{C}_6\text{H}_5$ ), 130.4 (s, *h*- $\text{C}_6\text{H}_5$ ), 132.6 (s, *e*- $\text{C}_6\text{H}_5$ ), 136.4 (s, *g*- $\text{C}_6\text{H}_5$ ), 165.8 (s, *i*-C=O).

### Kinetic experiments on benzaldehyde dimerization :

0.05 mol% of **2** was introduced into a known volume of aldehyde and stirred 18 °C. The progress of the reaction was monitored for one hour by taking an aliquot of the reaction mixture and measuring  $^1\text{H}$  NMR in  $\text{C}_6\text{D}_6$  at regular time intervals. Mesitylene was used as an internal standard to calculate the yield of the product.

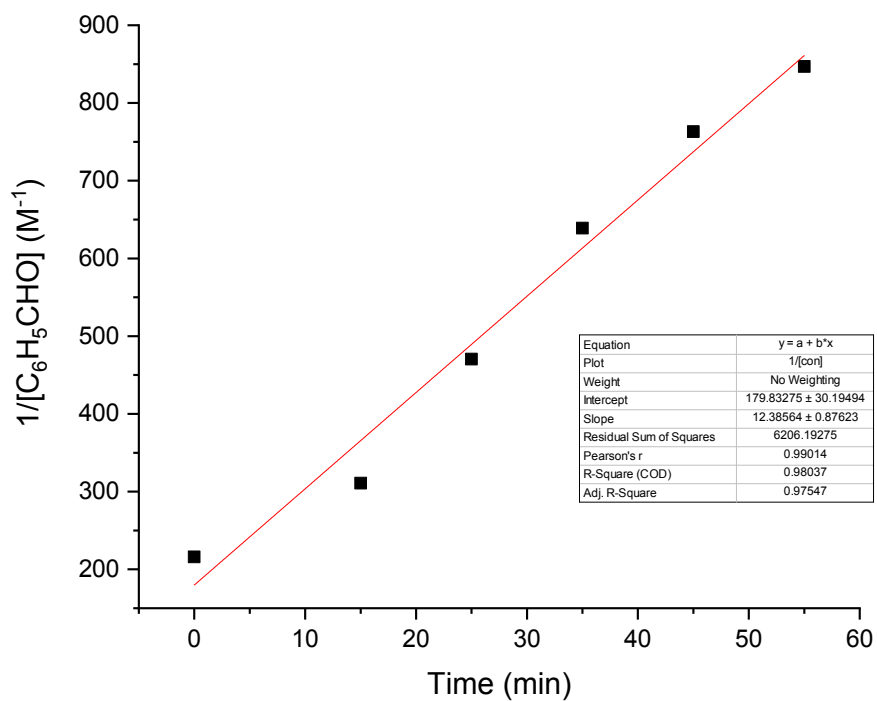

**Figure S16:** A plot of  $1/[\text{C}_6\text{H}_5\text{CHO}]$  vs the reaction time for the benzaldehyde dimerization.

**Control reaction:**

A reaction between benzaldehyde and 0.25 eq. of **2** in  $\text{CD}_2\text{Cl}_2$ .

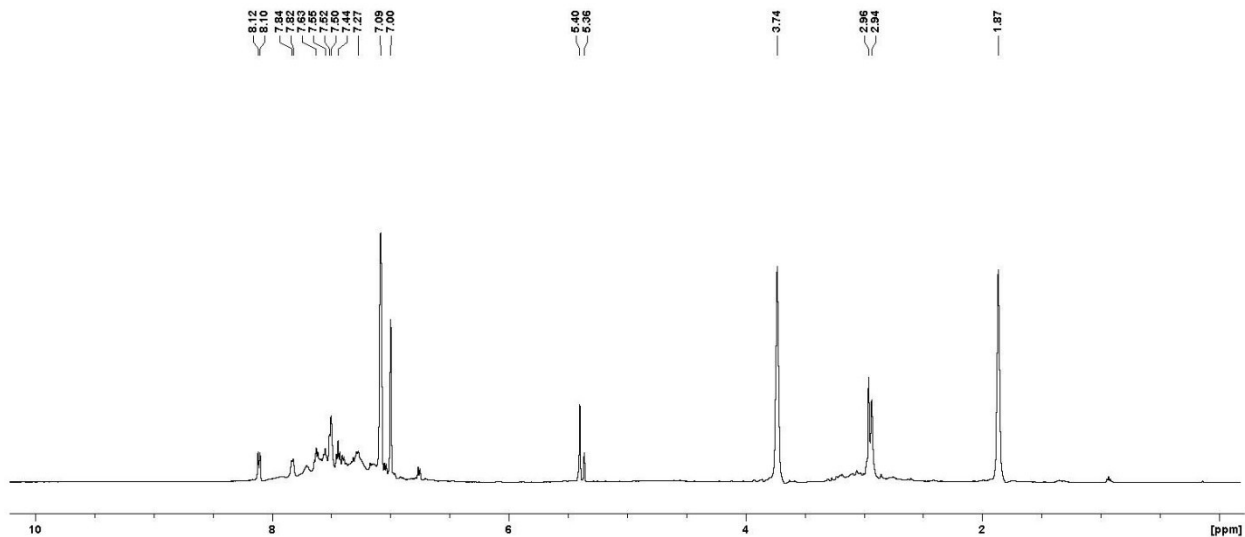

**Figure S17:**  $^1\text{H}$  NMR spectrum ( $[\text{CD}_2\text{Cl}_2]$ , 500 MHz) of **2** and benzaldehyde (1 : 4).

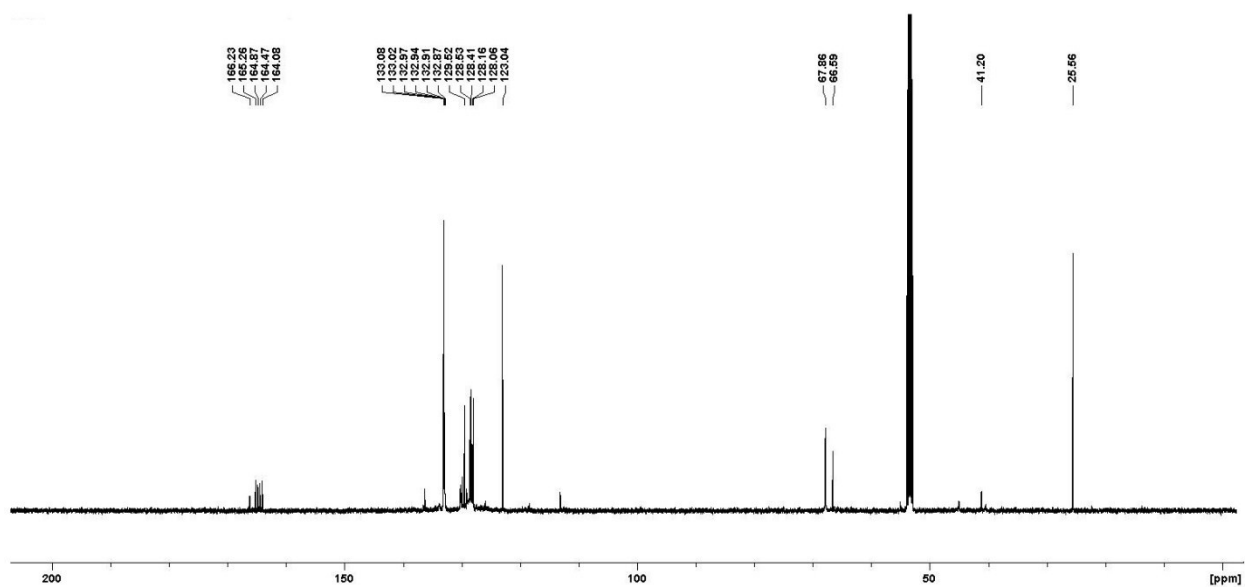

**Figure S18:**  $^{13}\text{C}$  NMR spectrum ( $[\text{CD}_2\text{Cl}_2]$ , 126 MHz) of **2** and benzaldehyde (1 : 4)

### Dimerization of p-tolualdehyde:

0.5 mol% **2** (0.005 g, 0.004 mmol), p-tolualdehyde (109.3  $\mu$ l, 0.92 mmol) and mesitylene (43  $\mu$ l, 0.31 mmol).

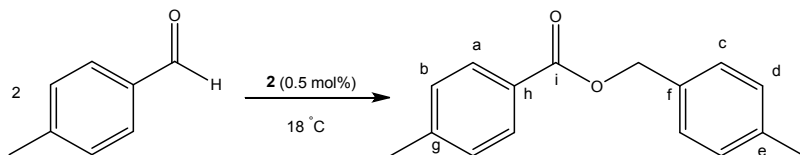

**Scheme S2:** Catalytic dimerization of p-tolualdehyde.

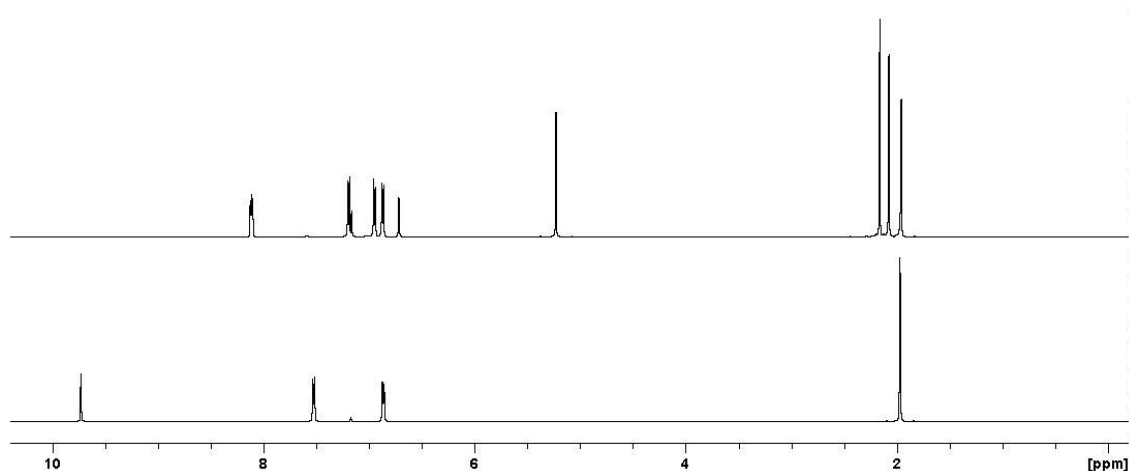

**Figure S19:** Stacking of  $^1\text{H}$  NMR spectra of p-tolualdehyde (bottom) and after (top) the product formation recorded in  $\text{C}_6\text{D}_6$  with internal reference (mesitylene).

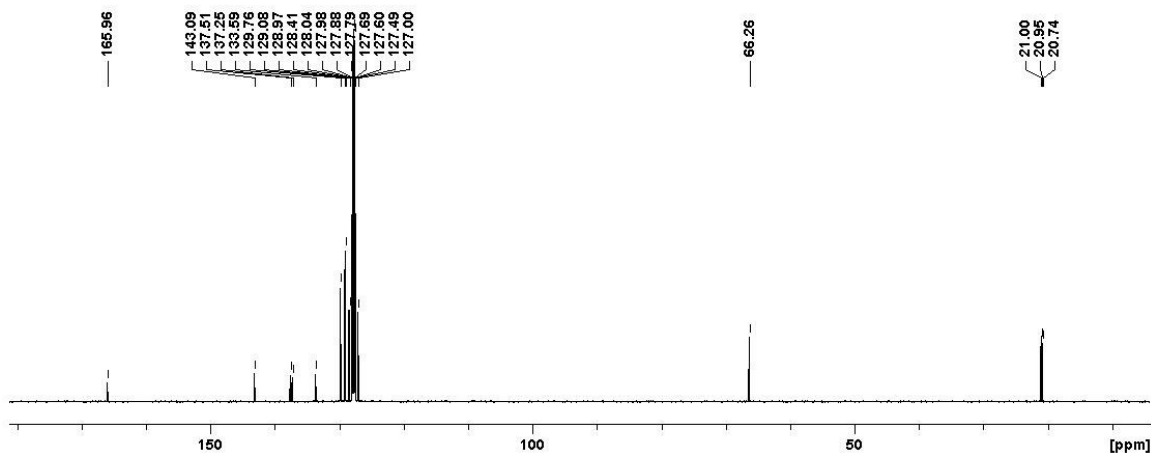

**Figure S20:**  $^{13}\text{C}$  NMR spectrum ( $[\text{C}_6\text{D}_6]$ , 126 MHz) of 4-methylbenzyl 4-methylbenzoate

$^1\text{H}$  NMR ( $\text{C}_6\text{D}_6$ , 500 MHz):  $\delta$  2.07 (s, 3H,  $\text{CH}_3$ ), 5.23 (s, 2H,  $\text{OCH}_2$ ), 6.87 (d, 2H,  $c\text{-CH}$ ) ( $^3J_{\text{HH}} = 10\text{Hz}$ ), 6.94 (d, 2H,  $d\text{-CH}$ ) ( $^3J_{\text{HH}} = 10\text{Hz}$ ), 7.18 (d, 2H,  $b\text{-CH}$ ) ( $^3J_{\text{HH}} = 5\text{Hz}$ ), 8.12 (d, 2H,  $a\text{-CH}$ ) ( $^3J_{\text{HH}} = 5\text{Hz}$ ). (**NMR Yield: 99 %**);  $^{13}\text{C}$  NMR ( $\text{C}_6\text{D}_6$ , 126 MHz):  $\delta$  21 (s,  $\text{CH}_3$ ), 66.2 (s,  $\text{OCH}_2$ ), 128.4 (s,  $b\text{-C}_6\text{H}_5$ ), 128.9 (s,  $c\text{-C}_6\text{H}_5$ ), 129 (s,  $d\text{-C}_6\text{H}_5$ ), 129.7 (s,  $a\text{-C}_6\text{H}_5$ ), 133.6 (s,  $e\text{-C}_6\text{H}_5$ ), 137.2 (s,  $f\text{-C}_6\text{H}_5$ ), 137.5 (s,  $g\text{-C}_6\text{H}_5$ ), 143.1 (s,  $h\text{-C}_6\text{H}_5$ ), 166 (s,  $i\text{-C=O}$ ).

### Dimerization of butanal:

**2** (0.005 g, 0.004 mmol), butanal (20.85  $\mu$ l, 0.23 mmol) and mesitylene (10.75  $\mu$ l, 0.07 mmol).

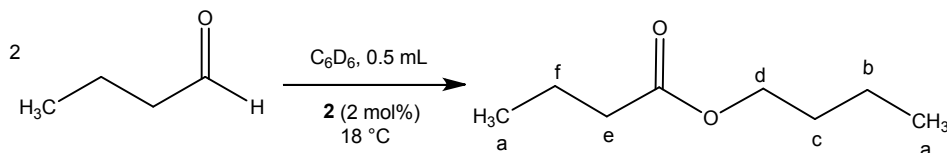

**Scheme S3:** Catalytic dimerization of butanal.

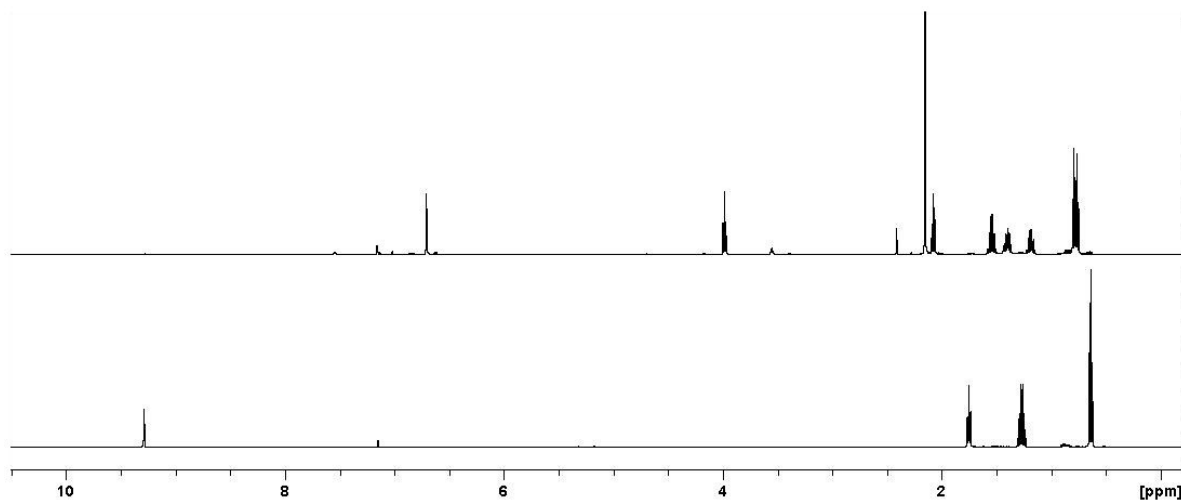

**Figure S21:** Stacking of  $^1H$  NMR spectra of butanal (bottom) and after (top) the product formation recorded in  $C_6D_6$  with internal reference (mesitylene).

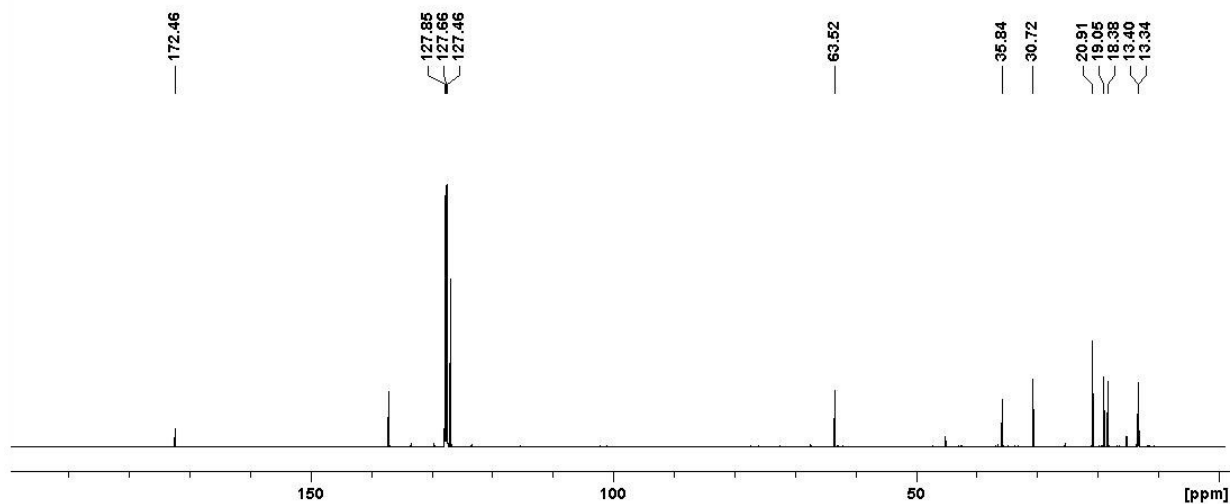

**Figure S22:**  $^{13}C$  NMR spectrum ( $[C_6D_6]$ , 126 MHz) of butyl butyrate.

$^1H$  NMR ( $C_6D_6$ , 500 MHz):  $\delta$  0.77 (t, 3H,  $CH_3$ ) ( $^3J_{HH} = 5$ Hz), 1.19 (sextet, 2H,  $b-CH_2$ ) ( $^3J_{HH} = 5$ Hz), 1.4 (quintet, 2H,  $c-CH_2$ ) ( $^3J_{HH} = 5$ Hz), 1.55 (sextet, 2H,  $f-CH_2$ ) ( $^3J_{HH} = 5$ Hz), 2.07 (t, 2H,  $e-CH_2$ ) ( $^3J_{HH} = 5$ Hz), 3.98 (t, 2H,  $d-OCH_2$ ) ( $^3J_{HH} = 5$ Hz). (**NMR Yield: 98 %**);  $^{13}C$  NMR ( $C_6D_6$ , 126 MHz):  $\delta$  13.3, 13.4 (s,  $a-CH_3$ ), 18.4 (s,  $b-CH_2$ ), 19 (s,  $f-CH_2$ ), 30.72 (s,  $c-CH_2$ ), 35.8 (s,  $e-CH_2$ ), 63.5 (s,  $d-OCH_2$ ), 172.4 (s,  $i-C=O$ ).

### Dimerization of 2-chloro benzaldehyde:

**2** (0.005 g, 0.004 mmol), 2-chloro benzaldehyde (104.2  $\mu$ l, 0.09 mmol) and mesitylene (4.3  $\mu$ l, 0.03 mmol).

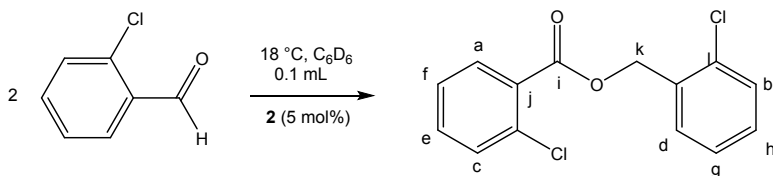

**Scheme S4:** Catalytic dimerization of 2-chloro benzaldehyde.

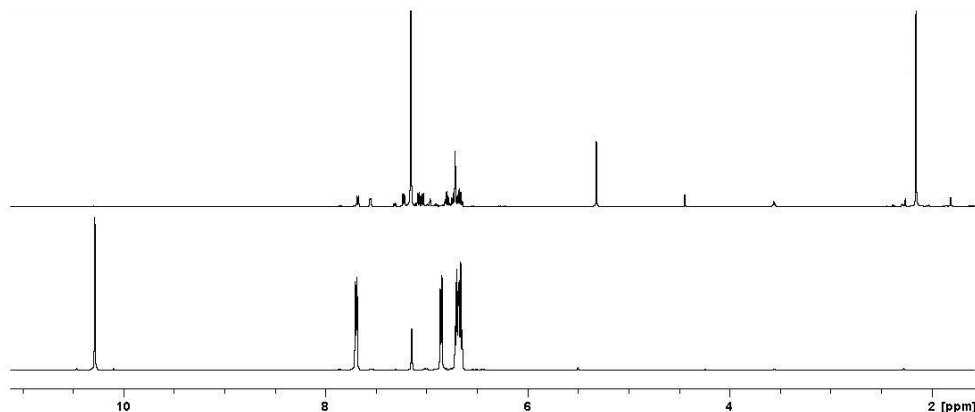

**Figure S23:** Stacking of  $^1\text{H}$  NMR spectra of 2-chloro benzaldehyde (bottom) and after (top) the product formation recorded in  $\text{C}_6\text{D}_6$  with internal reference (mesitylene).

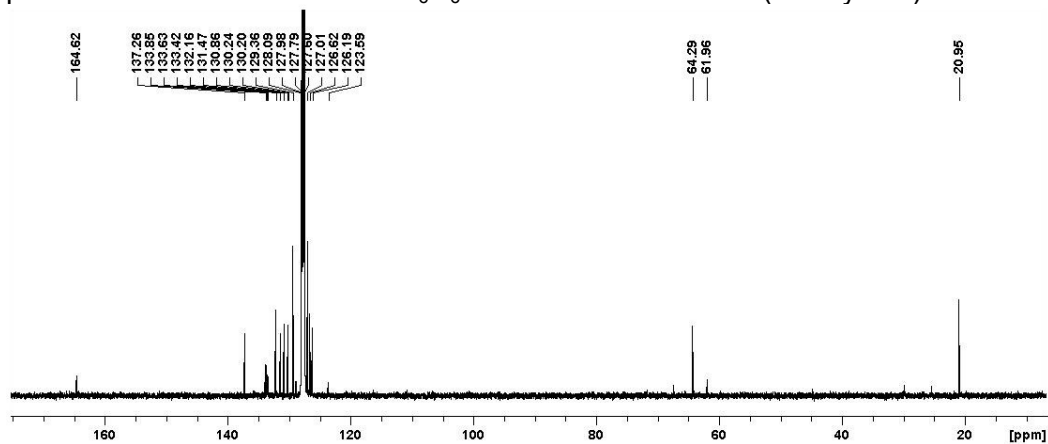

**Figure S24:**  $^{13}\text{C}$  NMR spectrum ( $[\text{C}_6\text{D}_6]$ , 126 MHz) of 2-chlorobenzyl 2-chlorobenzoate.

**$^1\text{H}$  NMR ( $\text{C}_6\text{D}_6$ , 500 MHz) (Poor solubility):**  $\delta$  5.32 (s, 2H,  $\text{OCH}_2$ ), 6.66 (m, 2H, *g,h-CH*) ( $^3J_{\text{HH}} = 5\text{Hz}$ ), 6.74 (t, 1H, *f-CH*) ( $^3J_{\text{HH}} = 5\text{Hz}$ ), 6.8 (t, 1H, *e-CH*) ( $^3J_{\text{HH}} = 5\text{Hz}$ ), 7.04 (d, 1H, *d-CH*) ( $^3J_{\text{HH}} = 10\text{Hz}$ ), 7.08 (d, 1H, *c-CH*) ( $^3J_{\text{HH}} = 10\text{Hz}$ ), 7.23 (d, 1H, *b-CH*) ( $^3J_{\text{HH}} = 10\text{Hz}$ ), 7.68 (d, 1H, *a-CH*) ( $^3J_{\text{HH}} = 5\text{Hz}$ ). (**NMR Yield: 96 %**);  
 **$^{13}\text{C}$  NMR ( $\text{C}_6\text{D}_6$ , 126 MHz):** 64.3 (s,  $\text{OCH}_2$ ), 126.2 (s, *e-C}\_6\text{H}\_4\text{Cl}), 126.6 (s, *g-C}\_6\text{H}\_4\text{Cl}), 127 (s, *h-C}\_6\text{H}\_4\text{Cl}), 128.1 (s, *c-C}\_6\text{H}\_4\text{Cl}), 129.3 (s, *f-C}\_6\text{H}\_4\text{Cl}), 130.2 (s, *l-C}\_6\text{H}\_4\text{Cl}), 130.2 (s, *b-C}\_6\text{H}\_4\text{Cl}), 130.8 (s, *d-C}\_6\text{H}\_4\text{Cl}), 131.5 (s, *a-C}\_6\text{H}\_4\text{Cl}), 137.2 (s, *j-C}\_6\text{H}\_4\text{Cl}), 164.6 9s, *i-C=O*).**********



### Dimerization of o-phthalaldehyde:

**2** (0.005 g, 0.004 mmol), o-phthalaldehyde (0.124 g, 0.92 mmol) and mesitylene (43  $\mu$ l, 0.31 mmol).

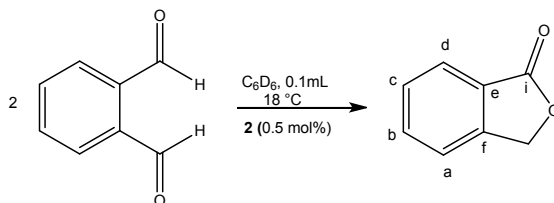

**Scheme S5:** Catalytic dimerization of o-phthalaldehyde.

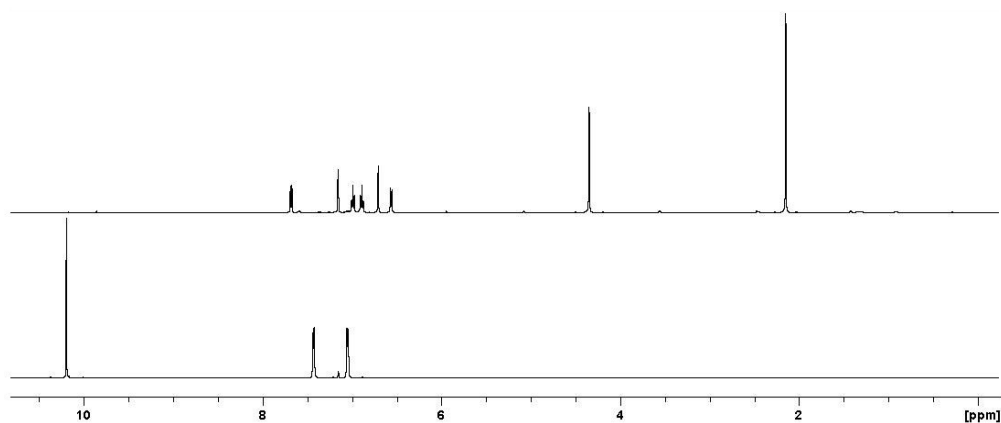

**Figure S25:** Stacking of  $^1H$  NMR spectra of o-phthalaldehyde (bottom) and after (top) the product formation recorded in  $C_6D_6$  with internal reference (mesitylene).

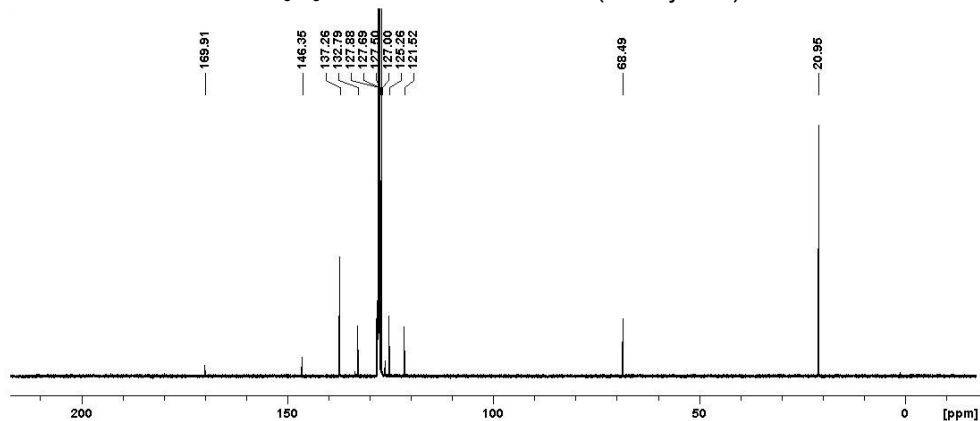

**Figure S26:**  $^{13}C$  NMR spectrum ( $[C_6D_6]$ , 126 MHz) of 1-Isobenzofuranone.

$^1H$  NMR ( $C_6D_6$ , 500 MHz)(Poor solubility):  $\delta$  4.35 (s, 2H,  $OCH_2$ ), 6.56 (d, 1H, *a-CH*) ( $^3J_{HH} = 5$ Hz), 6.99 (t, 1H, *b-CH*) ( $^3J_{HH} = 5$ Hz), 6.89 (t, 1H, *c-CH*) ( $^3J_{HH} = 5$ Hz), 7.68 (d, 1H, *d-CH*) ( $^3J_{HH} = 10$ Hz). (**NMR Yield: 98 %**);  $^{13}C$  NMR ( $C_6D_6$ , 126 MHz):  $\delta$  68.5 (s,  $OCH_2$ ), 121.5 (s, *d-C* $_6H_4$ ), 125.2 (s, *a-C* $_6H_4$ ), 128.5 (s, *b-C* $_6H_4$ ), 132.8 (s, *c-C* $_6H_4$ ), 137.2 (s, *e-C* $_6H_4$ ), 146.3 (s, *f-C* $_6H_4$ ), 169.9 (s, *i-C=O*).

### Dimerization of cyclohexyl carboxaldehyde:

**2** (0.005 g, 0.004 mmol), cyclohexyl carboxaldehyde (112.3  $\mu$ l, 0.92 mmol) and mesitylene (43  $\mu$ l, 0.31 mmol).

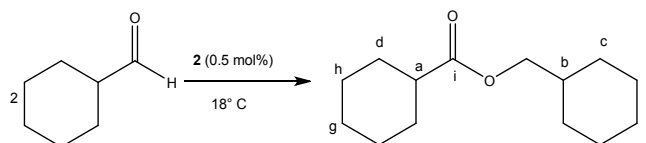

**Scheme S6:** Catalytic dimerization of cyclohexyl carboxaldehyde.

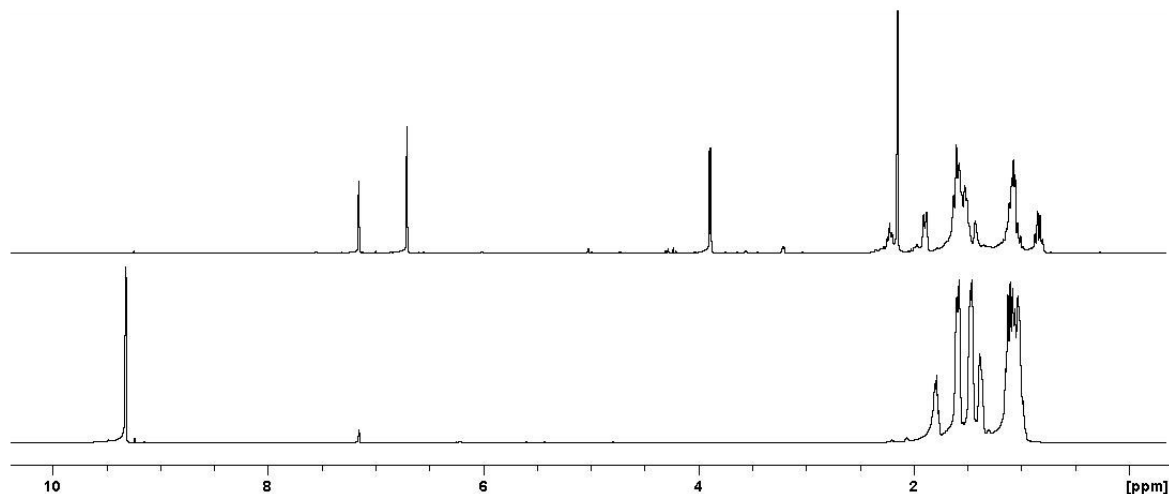

**Figure S27:** Stacking of  $^1\text{H}$  NMR spectra of cyclohexyl carboxaldehyde (bottom) and after (top) the product formation recorded in  $\text{C}_6\text{D}_6$  with internal reference (mesitylene).

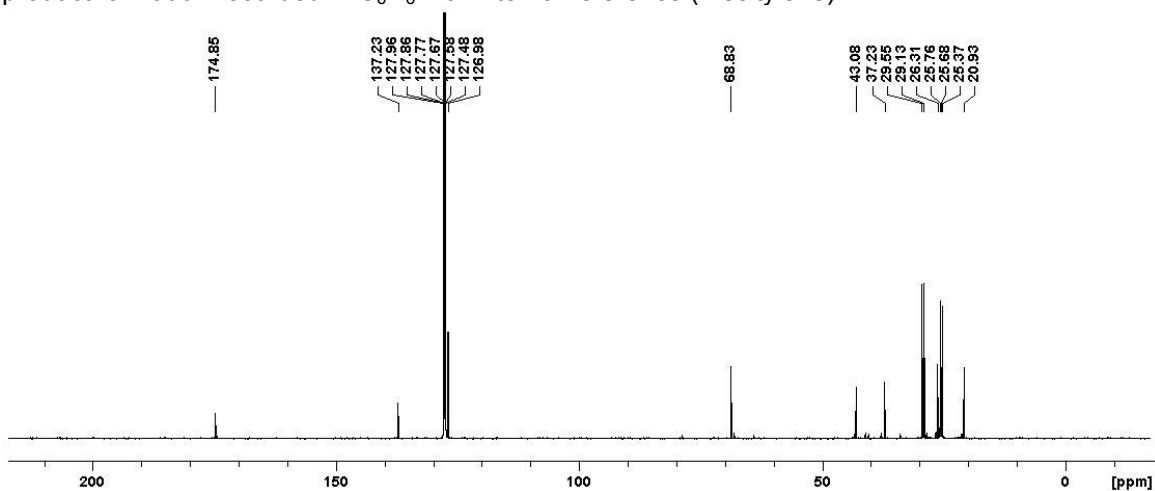

**Figure S28:**  $^{13}\text{C}$  NMR spectrum ( $[\text{C}_6\text{D}_6]$ , 126 MHz) of cyclohexylmethyl cyclohexanecarboxylate

$^1\text{H}$  NMR ( $\text{C}_6\text{D}_6$ , 500 MHz):  $\delta$  3.89 (s, 2H,  $\text{OCH}_2$ ), 2.23 (m, 1H,  $\text{CH}$ ), 1.9 (m, 1H,  $\text{CH}$ ), 1.57 (m, 12H,  $\text{CH}_2$ ), 1.08 (m, 6H,  $\text{CH}_2$ ), 0.84 (m, 2H,  $\text{CH}_2$ ). (NMR Yield: 98 %);  $^{13}\text{C}$  NMR ( $\text{C}_6\text{D}_6$ , 126 MHz):  $\delta$  25.3 (s,  $h$ - $\text{C}_6\text{H}_{11}$ ), 25.6 (s,  $g$ - $\text{C}_6\text{H}_{11}$ ), 25.7 (s,  $e$ - $\text{C}_6\text{H}_{11}$ ), 26.3 (s,  $f$ - $\text{C}_6\text{H}_{11}$ ), 29.1 (s,  $d$ - $\text{C}_6\text{H}_{11}$ ), 29.5 (s,  $c$ - $\text{C}_6\text{H}_{11}$ ), 37.2 (s,  $b$ - $\text{C}_6\text{H}_{11}$ ), 43.1 (s,  $a$ - $\text{C}_6\text{H}_{11}$ ), 68.8 (s,  $\text{OCH}_2$ ), 174.8 (s,  $i$ - $\text{C}=\text{O}$ ).

## CATALYTIC HYDROSILYLATION OF KETONES

**Typical procedure:** 5 mol % of **2** was loaded into an NMR tube fitted with a J Young joint containing C<sub>6</sub>D<sub>6</sub> (0.5 mL). This was followed by the addition equimolar amounts of Et<sub>3</sub>SiH and respective ketone. The solution was degassed by freeze-pump-thaw procedure and heated at 70 °C. The product formation was monitored by NMR spectroscopy. Mesitylene was used as an internal standard to calculate the yield of the product.

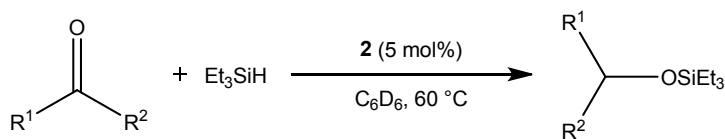

**Scheme S7:** General Hydrosilylation scheme

**Table S2:** Catalytic hydrosilylation promoted by **2**.

| Substrate 1 | Substrate 2         | Temp (° C) | Product | Time (h) | Yield (%) |
|-------------|---------------------|------------|---------|----------|-----------|
|             | Et <sub>3</sub> SiH | 60         |         | 32       | 95        |
|             | Et <sub>3</sub> SiH | 60         |         | 20       | 98        |
|             | Et <sub>3</sub> SiH | 60         |         | 34       | 98        |
|             | Et <sub>3</sub> SiH | 60         |         | 23       | 96        |
|             | Et <sub>3</sub> SiH | 60         |         | 15       | 98        |
|             | PhSiH <sub>3</sub>  | 25         |         | 108      | 99        |
|             | PhSiH <sub>3</sub>  | 25         |         | 53       | 99        |

### Hydrosilylation of benzophenone:

**2** (0.005 g, 0.004 mmol), benzophenone (0.0169 g, 0.09 mmol), triethylsilane (14.81  $\mu$ l, 0.09 mmol) and mesitylene (4.3  $\mu$ l, 0.03 mmol).

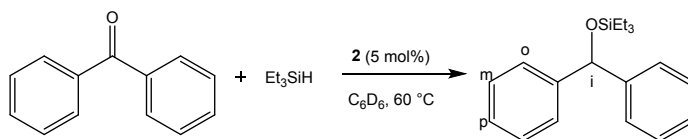

**Scheme S8:** Catalytic hydrosilylation of benzophenone.

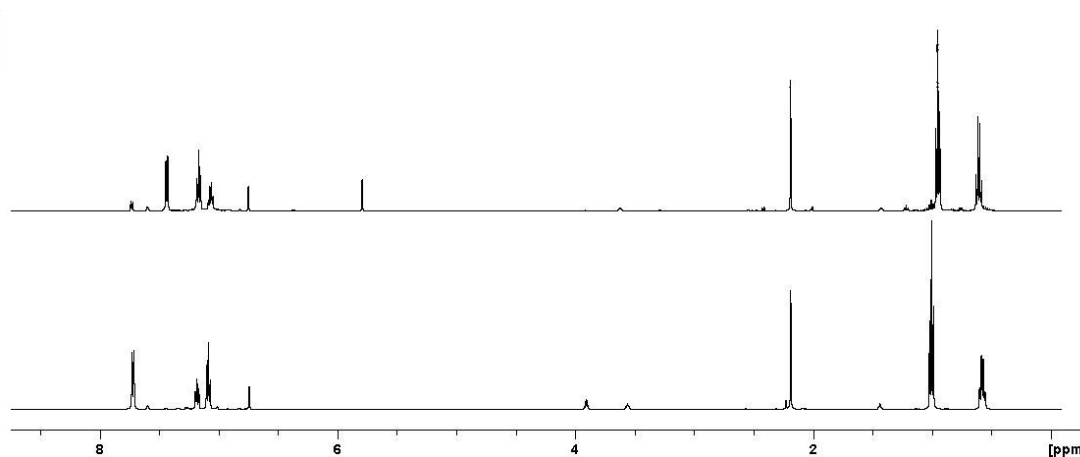

**Figure S29:** Stacking of  $^1\text{H}$  NMR spectra of hydrosilylation mixture ( $\text{Et}_3\text{SiH}$  and benzophenone) with catalyst before reaction (bottom) and after (top) the product formation recorded in  $\text{C}_6\text{D}_6$ .

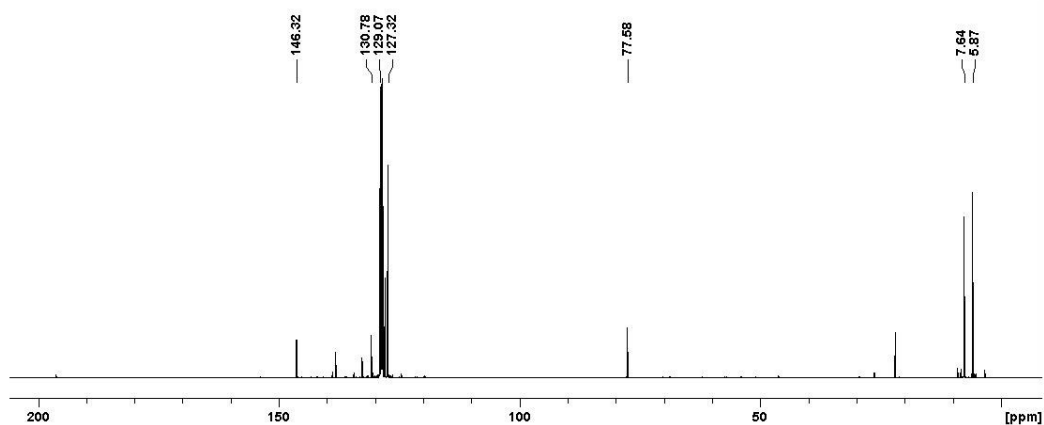

**Figure S30:**  $^{13}\text{C}$  NMR spectrum ( $[\text{C}_6\text{D}_6]$ , 126 MHz) of (benzhydroxy)triethylsilane

$^1\text{H}$  NMR ( $\text{C}_6\text{D}_6$ , 500 MHz):  $\delta$  0.59 (q, 6H,  $\text{OSiCH}_2\text{CH}_3$ ) ( $^3J_{\text{HH}} = 5\text{Hz}$ ), 0.93 (t, 9H,  $\text{OSiCH}_2\text{CH}_3$ ) ( $^3J_{\text{HH}} = 5\text{Hz}$ ), 2.16 (s, 3H, *Mes-CH*<sub>3</sub>), 5.79 (s, 1H, *CH*), 6.71 (s, 1H, *Mes-CH*), 7.05 (t, 2H, *p-C*<sub>6</sub>H<sub>5</sub>) ( $^3J_{\text{HH}} = 10\text{Hz}$ ), 7.14 (t, 4H, *m-C*<sub>6</sub>H<sub>5</sub>) ( $^3J_{\text{HH}} = 10\text{Hz}$ ), 7.42 (t, 4H, *o-C*<sub>6</sub>H<sub>5</sub>) ( $^3J_{\text{HH}} = 10\text{Hz}$ ). (**NMR Yield: 95.3 %**);  $^{13}\text{C}$  NMR ( $\text{C}_6\text{D}_6$ , 126 MHz):  $\delta$  5.8 (s,  $\text{OSiCH}_2\text{CH}_3$ ), 7.6 (s,  $\text{OSiCH}_2\text{CH}_3$ ), 77.5 (s, *CH-OSiEt*<sub>3</sub>), 127.3 (s, *p-C*<sub>6</sub>H<sub>5</sub>), 129 (s, *o-C*<sub>6</sub>H<sub>5</sub>), 130.7 (s, *m-C*<sub>6</sub>H<sub>5</sub>), 146.3 (*i-C*<sub>6</sub>H<sub>5</sub>).

### Hydrosilylation of acetophenone:

**2** (0.005 g, 0.004 mmol), acetophenone (10.81  $\mu$ l, 0.09 mmol), triethylsilane (14.81  $\mu$ l, 0.09 mmol) and mesitylene (4.3  $\mu$ l, 0.03 mmol).

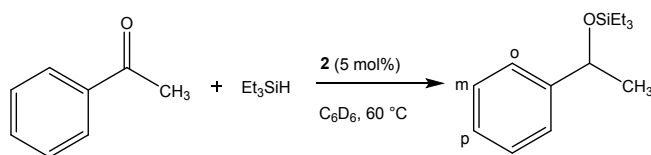

**Scheme S9:** Catalytic hydrosilylation of acetophenone.

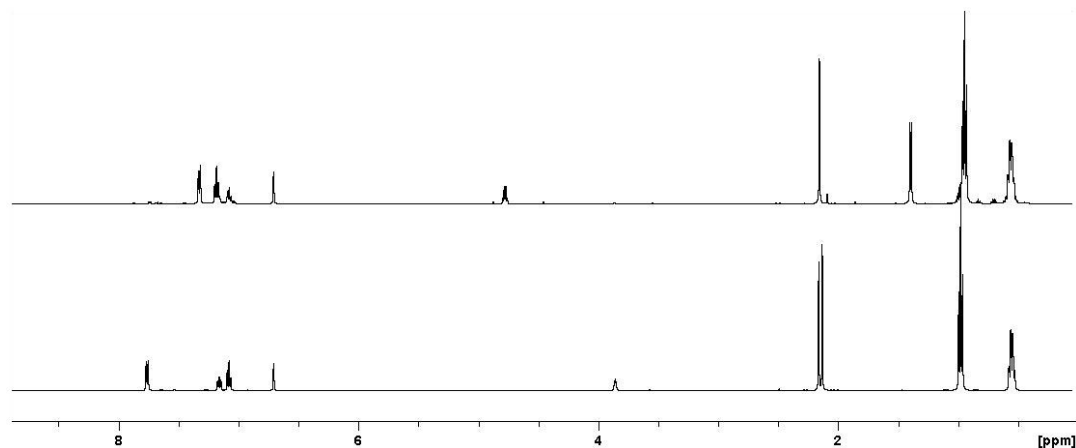

**Figure S31:** Stacking of  $^1\text{H}$  NMR spectra of hydrosilylation mixture ( $\text{Et}_3\text{SiH}$  and acetophenone) with catalyst before reaction (bottom) and after (top) the product formation recorded in  $\text{C}_6\text{D}_6$ .

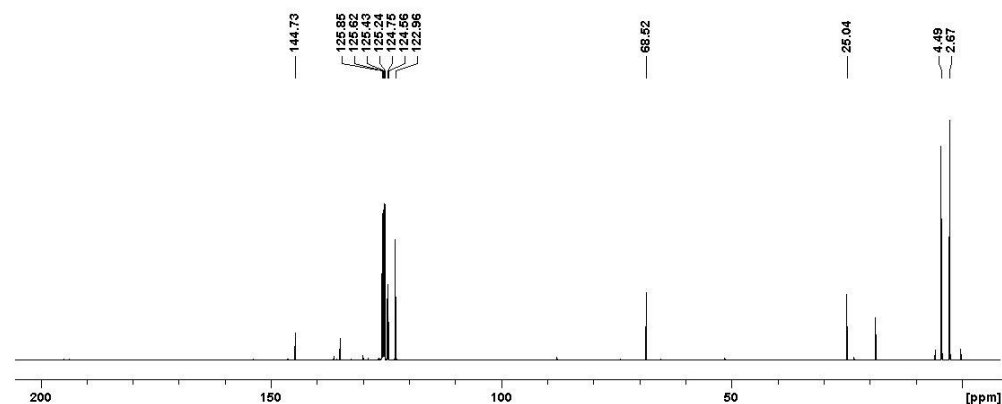

**Figure S32:**  $^{13}\text{C}$  NMR ( $[\text{C}_6\text{D}_6]$ , 126 MHz) of triethyl(1-phenylethoxy)silane.

**$^1\text{H}$  NMR ( $\text{C}_6\text{D}_6$ , 500 MHz):**  $\delta$  0.57 (q, 6H,  $\text{OSiCH}_2\text{CH}_3$ ) ( $^3J_{\text{HH}} = 10\text{Hz}$ ), 0.93 (t, 9H,  $\text{OSiCH}_2\text{CH}_3$ ) ( $^3J_{\text{HH}} = 10\text{Hz}$ ), 1.39 (d, 3H,  $\text{CH}_3$ ) ( $^3J_{\text{HH}} = 10\text{Hz}$ ), 2.16 (s, 3H, Mes- $\text{CH}_3$ ), 4.77 (q, 1H,  $\text{CH}$ ) ( $^3J_{\text{HH}} = 10\text{Hz}$ ), 6.71 (s, 1H, Mes- $\text{CH}$ ), 7.08 (t, 2H,  $p\text{-C}_6\text{H}_5$ ) ( $^3J_{\text{HH}} = 5\text{Hz}$ ), 7.19 (t, 4H,  $o\text{-C}_6\text{H}_5$ ) ( $^3J_{\text{HH}} = 5\text{Hz}$ ), 7.33 (t, 4H,  $m\text{-C}_6\text{H}_5$ ) ( $^3J_{\text{HH}} = 5\text{Hz}$ ). (**NMR Yield: 98 %**);  **$^{13}\text{C}$  NMR ( $\text{C}_6\text{D}_6$ , 126 MHz):**  $\delta$  2.6 (s,  $\text{OSiCH}_2\text{CH}_3$ ), 4.5 (s,  $\text{OSiCH}_2\text{CH}_3$ ), 25 (s,  $\text{CH}_3\text{CHPhOSiEt}_3$ ), 68.5 (s,  $\text{CH-OSiEt}_3$ ), 123 (s,  $m\text{-C}_6\text{H}_5$ ), 124.5 (s,  $p\text{-C}_6\text{H}_5$ ), 124.7 (s,  $m\text{-C}_6\text{H}_5$ ), 144.7 ( $i\text{-C}_6\text{H}_5$ ).

### Hydrosilylation of cyclohexanone:

5 Mol% **2** (0.01 g, 0.009 mmol), cyclohexanone (19.2  $\mu$ l, 0.18 mmol), triethylsilane (29.62  $\mu$ l, 0.18 mmol) and mesitylene (8.6  $\mu$ l, 0.06 mmol).

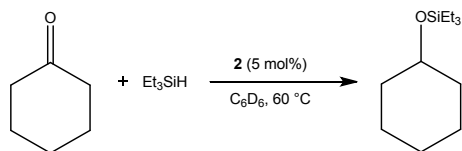

**Scheme S10:** Catalytic hydrosilylation of cyclohexanone.

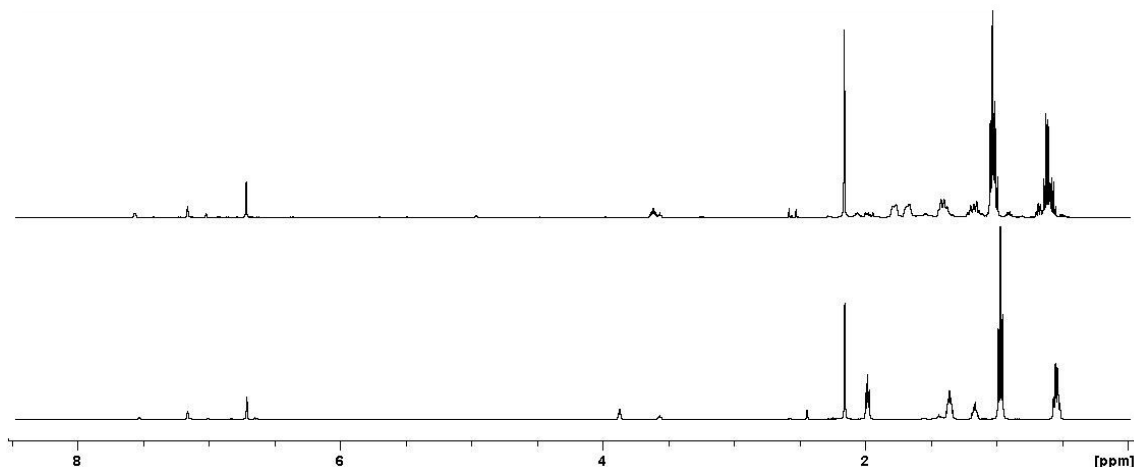

**Figure S33:** Stacking of  $^1\text{H}$  NMR spectra of hydrosilylation mixture ( $\text{Et}_3\text{SiH}$  and cyclohexanone) with catalyst before reaction (bottom) and after (top) the product formation recorded in  $\text{C}_6\text{D}_6$ .

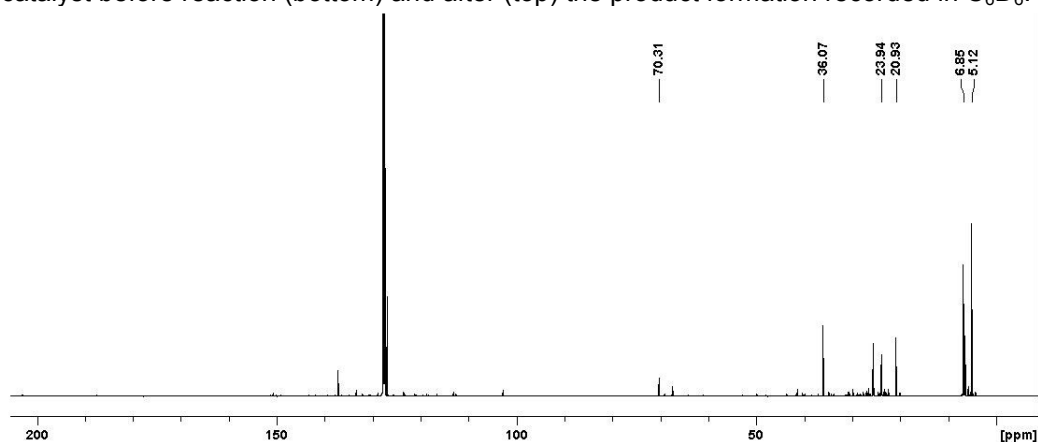

**Figure S34:**  $^{13}\text{C}$  NMR spectrum ( $[\text{C}_6\text{D}_6]$ , 126 MHz) of (cyclohexyloxy)triethylsilane

$^1\text{H}$  NMR ( $\text{C}_6\text{D}_6$ , 500 MHz):  $\delta$  0.57 (q, 6H,  $\text{OSiCH}_2\text{CH}_3$ ) ( $^3J_{\text{HH}} = 10\text{Hz}$ ), 0.62 (t, 9H,  $\text{OSiCH}_2\text{CH}_3$ ) ( $^3J_{\text{HH}} = 5\text{Hz}$ ), 1.03 (s, 3H,  $\text{CH}_3$ ), 1.21 (m, 3H,  $\text{C}_6\text{H}_{10}$ ), 1.43 (m, 3H,  $\text{C}_6\text{H}_{10}$ ), 1.68 (m, 2H,  $\text{C}_6\text{H}_{10}$ ), 1.77 (m, 2H,  $\text{C}_6\text{H}_{10}$ ), 2.16 (s, 3H, *Mes-CH*), 3.61 (q, 1H, *CH*), 6.71 (s, 1H, *Mes-CH*). (NMR Yield: 96 %);  $^{13}\text{C}$  NMR ( $\text{C}_6\text{D}_6$ , 126 MHz):  $\delta$  5.1 (s,  $\text{OSiCH}_2\text{CH}_3$ ), 6.8 (s,  $\text{OSiCH}_2\text{CH}_3$ ), 21 (s,  $\alpha\text{-C}_6\text{H}_{11}$ ), 24 (s,  $\gamma\text{-C}_6\text{H}_{11}$ ), 36 (s,  $\alpha, \beta\text{-C}_6\text{H}_{11}$ ), 70.3 (s,  $\text{CHOSiEt}_3$ ).

### Hydrosilylation of 1, 3-dichloroacetone:

**2** (0.01 g, 0.009 mmol), 1, 3-dichloroacetone (0.02 g, 0.18 mmol), triethylsilane (29.62  $\mu$ l, 0.18 mmol) and mesitylene (8.6  $\mu$ l, 0.06 mmol).

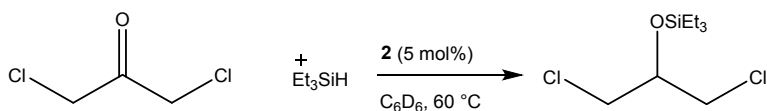

**Scheme S11:** Catalytic hydrosilylation of 1, 3-dichloroacetone.

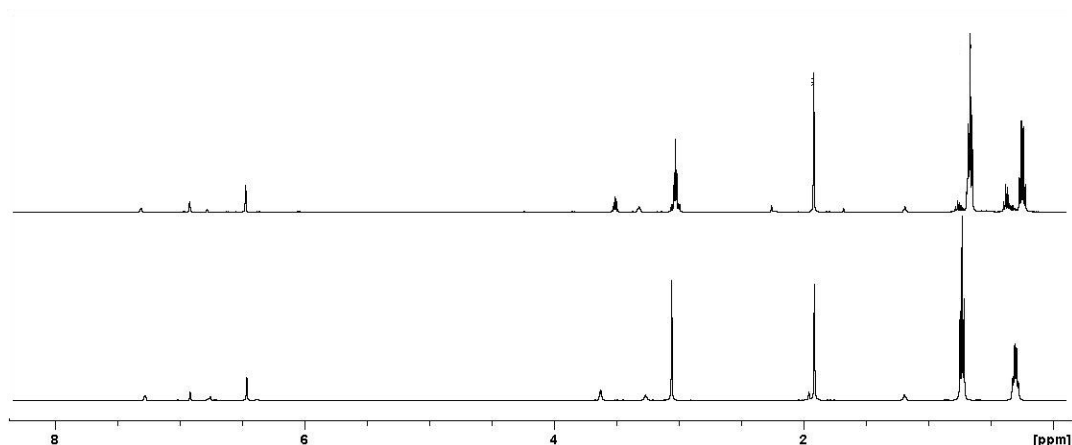

**Figure S35:** Stacking of  $^1\text{H}$  NMR spectra of hydrosilylation mixture ( $\text{Et}_3\text{SiH}$  and 1, 3-dichloroacetone) with catalyst before reaction (bottom) and after (top) the product formation recorded in  $\text{C}_6\text{D}_6$ .

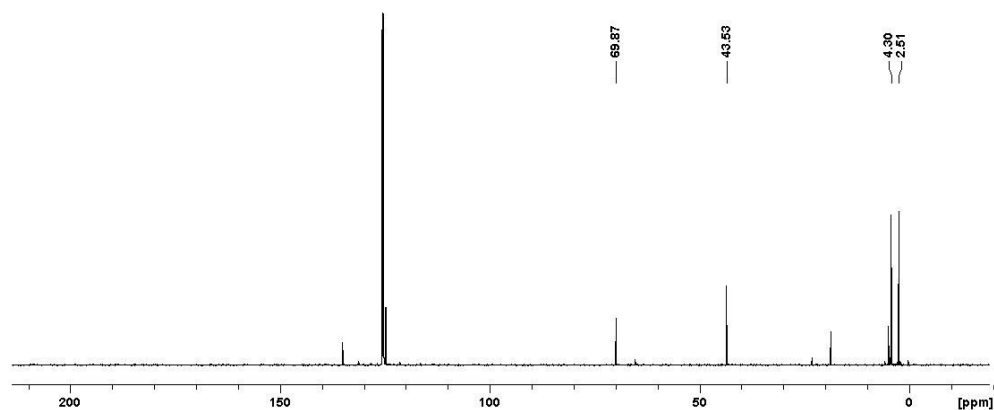

**Figure S36:**  $^{13}\text{C}$  NMR spectrum ( $[\text{C}_6\text{D}_6]$ , 126 MHz) of ((1,3-dichloropropan-2-yl)oxy)triethylsilane.

$^1\text{H}$  NMR ( $\text{C}_6\text{D}_6$ , 500 MHz):  $\delta$  0.48 (q, 6H,  $\text{OSiCH}_2\text{CH}_3$ ) ( $^3J_{\text{HH}} = 5\text{Hz}$ ), 0.9 (t, 9H,  $\text{OSiCH}_2\text{CH}_3$ ) ( $^3J_{\text{HH}} = 5\text{Hz}$ ), 2.16 (s, 3H, Mes- $\text{CH}_3$ ), 3.25 (t, 4H,  $\text{CH}_2$ ) ( $^3J_{\text{HH}} = 5\text{Hz}$ ), 3.74 (q, 1H,  $\text{CH}$ ) ( $^3J_{\text{HH}} = 5\text{Hz}$ ), 6.71 (s, 1H, Mes- $\text{CH}$ ). (NMR Yield: 98 %);  $^{13}\text{C}$  NMR ( $\text{C}_6\text{D}_6$ , 126 MHz):  $\delta$  2.5 (s,  $\text{OSiCH}_2\text{CH}_3$ ), 4.3 (s,  $\text{OSiCH}_2\text{CH}_3$ ), 43.5 (s,  $\text{CH}_2\text{Cl}$ ), 69.8 (s,  $\text{CHOSiEt}_3$ ).

### Hydrosilylation of 4, 4'-dimethylbenzophenone:

**2** (0.01 g, 0.009 mmol), 4, 4'-dimethylbenzophenone (0.03, 0.18 mmol), triethylsilane (29.62  $\mu$ l, 0.18 mmol) and mesitylene (8.6  $\mu$ l, 0.06 mmol).

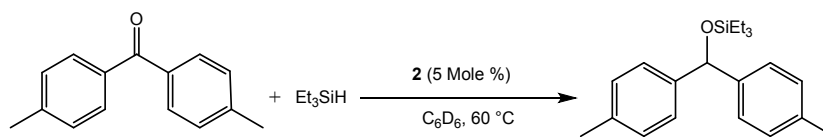

**Scheme S12:** Catalytic hydrosilylation of 4, 4'-dimethylbenzophenone.

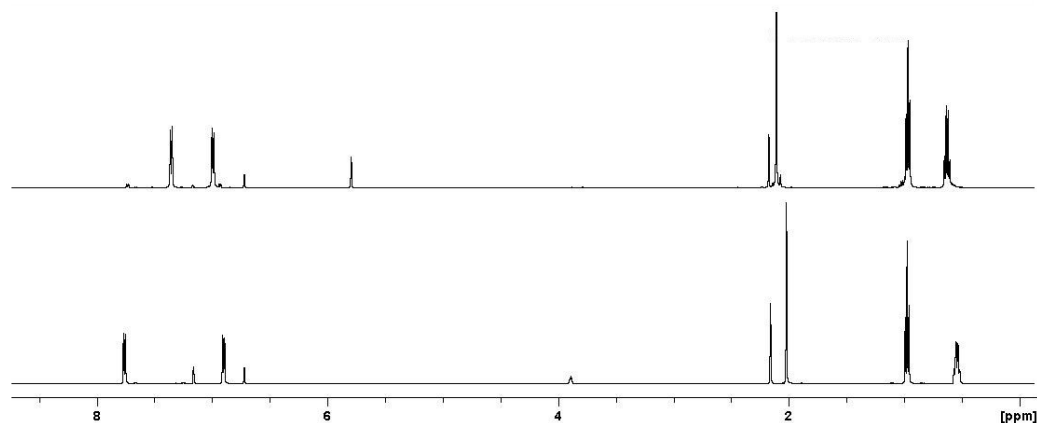

**Figure S37:** Stacking of  $^1\text{H}$  NMR spectra of hydrosilylation mixture ( $\text{Et}_3\text{SiH}$  and 4, 4'-dimethylbenzophenone) with catalyst before reaction (bottom) and after (top) the product formation recorded in  $\text{C}_6\text{D}_6$ .

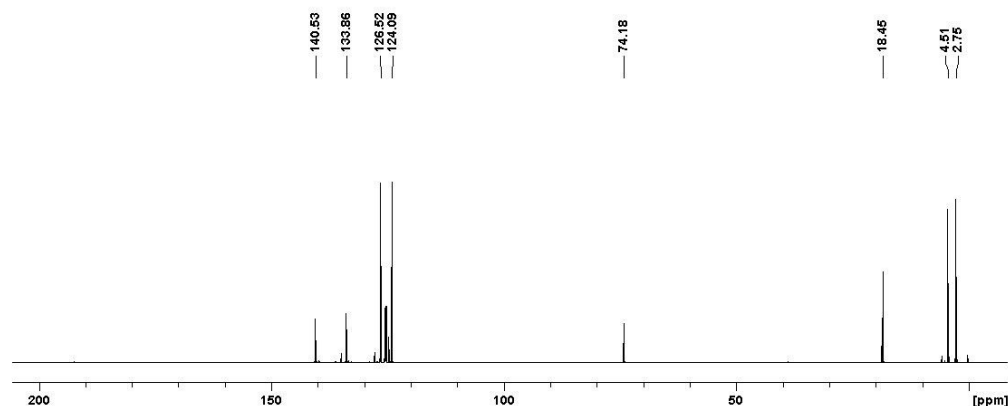

**Figure S38:**  $^{13}\text{C}$  NMR spectrum ( $[\text{C}_6\text{D}_6]$ , 126 MHz) of (di-p-tolylmethoxy)triethylsilane.

$^1\text{H}$  NMR ( $\text{C}_6\text{D}_6$ , 500 MHz):  $\delta$  0.62 (q, 6H,  $\text{OSiCH}_2\text{CH}_3$ ) ( $^3J_{\text{HH}} = 5\text{Hz}$ ), 0.96 (t, 9H,  $\text{OSiCH}_2\text{CH}_3$ ) ( $^3J_{\text{HH}} = 5\text{Hz}$ ), 2.09 (s,  $\text{CH}_3$ ), 2.16 (s, 3H, *Mes-CH*<sub>3</sub>), 5.79 (s, 1H, *CH*), 6.72 (s, 1H, *Mes-CH*), 6.99 (d, 4H,  $\text{C}_6\text{H}_4$ ) ( $^3J_{\text{HH}} = 10\text{Hz}$ ), 7.37 (d, 4H,  $\text{C}_6\text{H}_4$ ) ( $^3J_{\text{HH}} = 10\text{Hz}$ ). (NMR Yield: 98 %);  $^{13}\text{C}$  NMR ( $\text{C}_6\text{D}_6$ , 126 MHz):  $\delta$  2.7 (s,  $\text{OSiCH}_2\text{CH}_3$ ), 4.5 (s,  $\text{OSiCH}_2\text{CH}_3$ ), 18.4 (s,  $\text{CH}_3$ ), 74.2 (s, *CH-OSiEt*<sub>3</sub>), 125 (s,  $\alpha\text{-C}_6\text{H}_5$ ), 126.5 (s,  $\beta\text{-C}_6\text{H}_5$ ), 133.8 (s,  $\gamma\text{-C}_6\text{H}_5$ ), 140.5 (*i-C*<sub>6</sub>H<sub>5</sub>).



## Deoxygenation of ketones.

**Typical procedure:** 5 mol % of **2** was loaded into an NMR tube fitted with a J Young joint containing CD<sub>2</sub>Cl<sub>2</sub> (0.5 mL). This was followed by the addition equimolar amounts of PhSiH<sub>3</sub> and respective ketone. The solution was degassed by freeze-pump-thaw procedure and heated at 70 °C. The product formation was monitored by NMR spectroscopy. Mesitylene was used as an internal standard to calculate the yield of the product.

## Deoxygenation of benzophenone

5 Mol% **2** (0.01 g, 0.009 mmol), benzophenone (0.03g, 0.18 mmol), phenylsilane (7.61 μl, 0.06 mmol) and mesitylene (8.6 μl, 0.06 mmol).

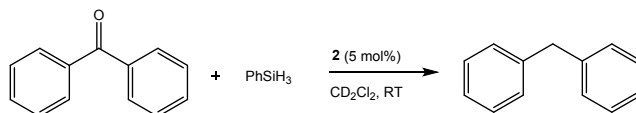

**Scheme S13:** Catalytic deoxygenation of benzophenone.

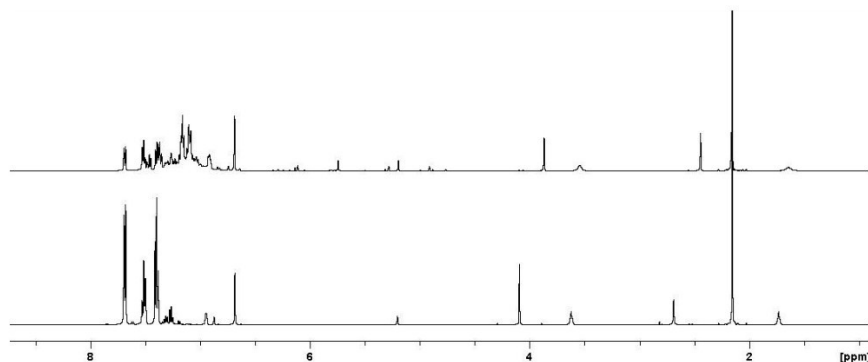

**Figure S39:** Stacking of <sup>1</sup>H NMR spectra of hydrosilylation mixture (PhSiH<sub>3</sub> and benzophenone) with catalyst before reaction (bottom) and after (top) the product formation recorded in CD<sub>2</sub>Cl<sub>2</sub>.

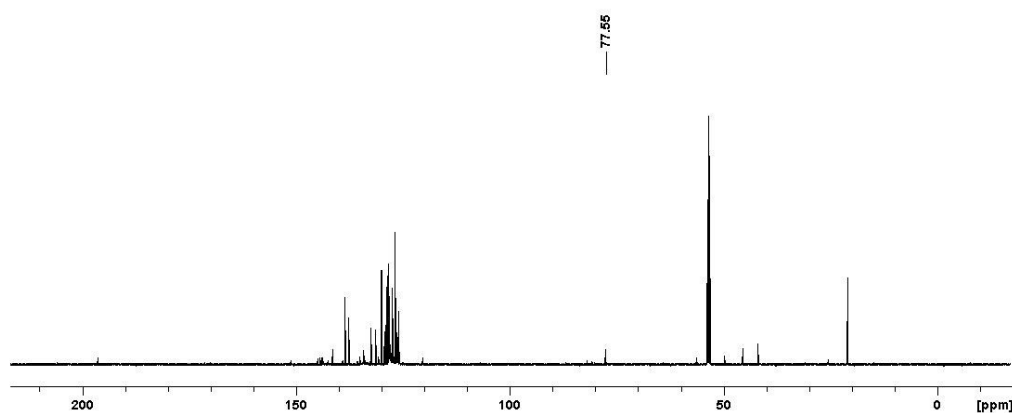

**Figure S40:** <sup>13</sup>C NMR spectrum ([CD<sub>2</sub>Cl<sub>2</sub>], 126 MHz) of diphenylmethane.

<sup>1</sup>H NMR (CD<sub>2</sub>Cl<sub>2</sub>, 500 MHz): δ 3.97 (s, Ph<sub>2</sub>CH<sub>2</sub>), 5.29 (s, PhSiH<sub>2</sub>), 5.84 (s, Ph<sub>2</sub>CHSiO) (NMR Yield: 99 % with respect to PhSiH<sub>3</sub>); <sup>13</sup>C NMR (CD<sub>2</sub>Cl<sub>2</sub>, 126 MHz): δ 77.5 (s, Ph<sub>2</sub>CH<sub>2</sub>).

### Deoxygenation of 4,4'-dimethylbenzophenone

5 Mol% **2** (0.01 g, 0.009 mmol), 4, 4'-dimethylbenzophenone (0.03g, 0.18 mmol), phenylsilane (7.61  $\mu$ l, 0.06 mmol) and mesitylene (8.6  $\mu$ l, 0.06 mmol).

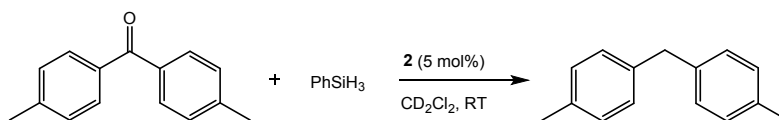

**Scheme S14:** Catalytic deoxygenation of 4, 4'-dimethylbenzophenone.

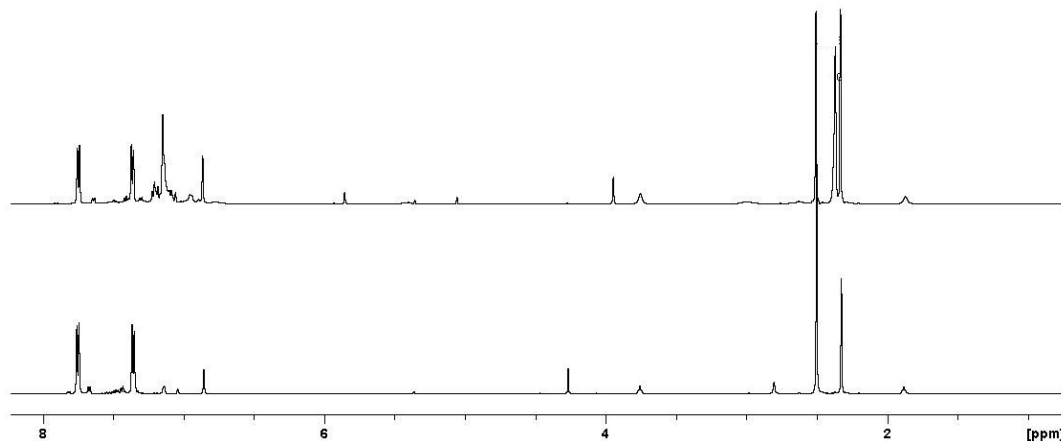

**Figure S41:** Stacking of <sup>1</sup>H NMR spectra of hydrosilylation mixture (PhSiH<sub>3</sub> and 4,4'-dimethylbenzophenone) with catalyst before reaction (bottom) and after (top) the product formation recorded in CD<sub>2</sub>Cl<sub>2</sub>.

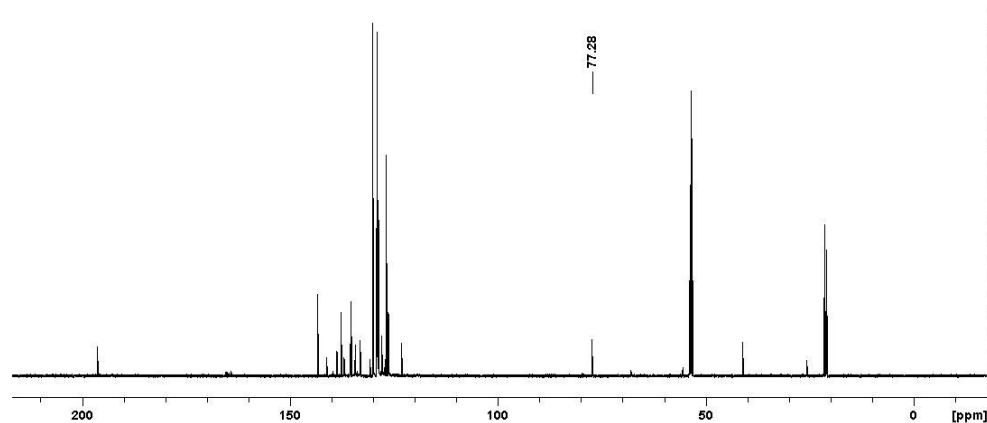

**Figure S42:** <sup>13</sup>C NMR spectrum ([CD<sub>2</sub>Cl<sub>2</sub>], 126 MHz) of di-p-tolylmethane.

<sup>1</sup>H NMR (CD<sub>2</sub>Cl<sub>2</sub>, 500 MHz):  $\delta$  4 (s, Ph<sub>2</sub>CH<sub>2</sub>), 5.33 (s, PhSiH<sub>2</sub>), 5.88 (s, Ph<sub>2</sub>CHSiO) (NMR Yield: 99 % with respect to PhSiH<sub>3</sub>); <sup>13</sup>C NMR (CD<sub>2</sub>Cl<sub>2</sub>, 126 MHz):  $\delta$  77.3 (s, Ph<sub>2</sub>CH<sub>2</sub>).

## HYDROBORATION AND HYDROSTANNYLATION OF 4,4'-DIMETHYLBENZOPHENONE

**Typical procedure:** 5 mol % of **2** was loaded into an NMR tube fitted with a J Young joint containing CD<sub>2</sub>Cl<sub>2</sub> (0.5 mL). This was followed by the addition equimolar amounts of HBpin/ (tBu)<sub>3</sub>SnH and respective ketone. The solution was degassed by freeze-pump-thaw procedure and heated at 70 °C in the case of hydroboration while hydrostannylation was performed at ambient temperature. The product formation was monitored by NMR spectroscopy. Yield of the reactions at 20h was recorded. Mesitylene was used as an internal standard to calculate the yield of the product.

### Hydroboration of 4,4'-dimethylbenzophenone:

**2** (0.005 g, 0.004 mmol), 4,4'-dimethylbenzophenone (0.02g, 0.09 mmol), 4,4,5,5-tetramethyl-1,3,2-dioxaborolane (HBpin) (13.45 µl, 0.09 mmol) and mesitylene (4.3 µl, 0.03 mmol).

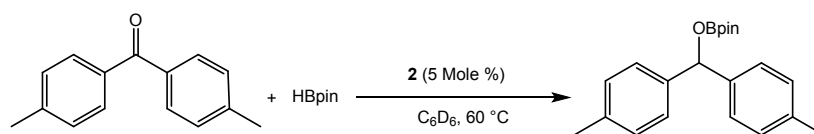

**Scheme S15:** Catalytic hydroboration of 4, 4'-dimethylbenzophenone.

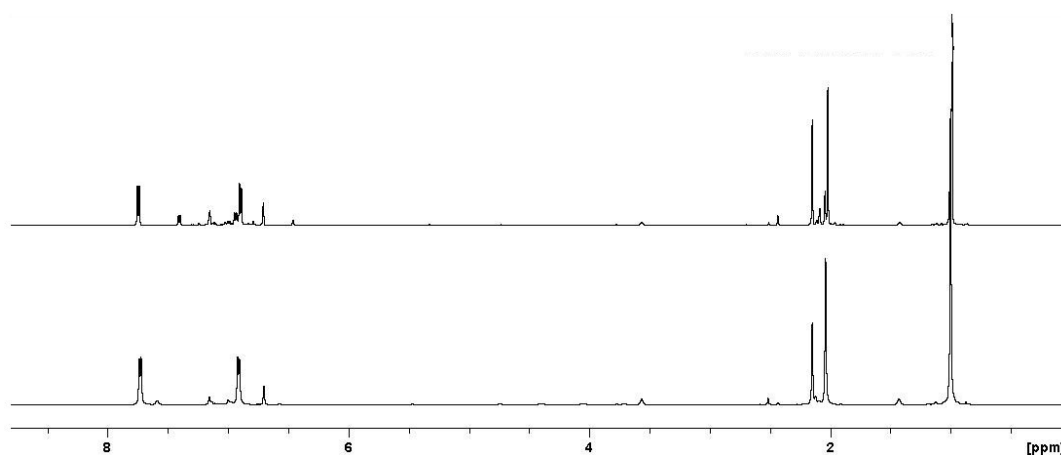

**Figure S43:** Stacking of <sup>1</sup>H NMR spectra of hydroboration mixture (HBpin and 4, 4'-dimethyl benzophenone) with catalyst before reaction (bottom) and after (top) the product formation recorded in C<sub>6</sub>D<sub>6</sub>.

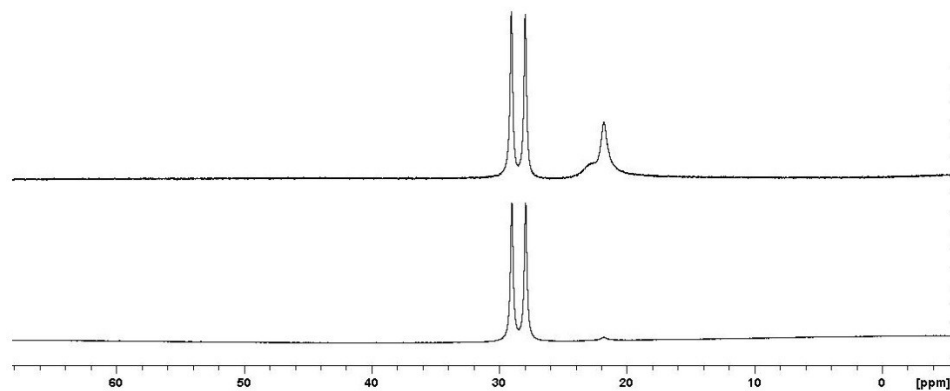

**Figure S44:** Stacking of <sup>11</sup>B NMR spectra of hydroboration mixture (PhSiH<sub>3</sub> and 4,4'-dimethyl benzophenone) with catalyst before reaction (bottom) and after (top) the product formation recorded in C<sub>6</sub>D<sub>6</sub>.

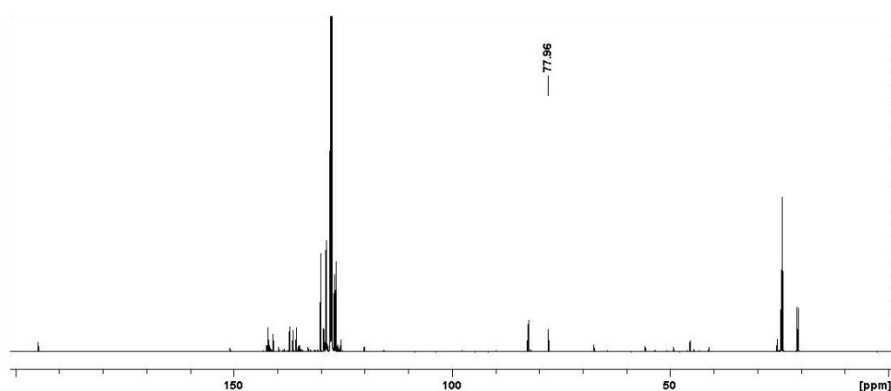

**Figure S45:** <sup>13</sup>C NMR spectrum ([C<sub>6</sub>D<sub>6</sub>], 126 MHz) of 2-(di-p-tolylmethoxy)-4,4,5,5-tetramethyl-1,3,2-dioxaborolane.

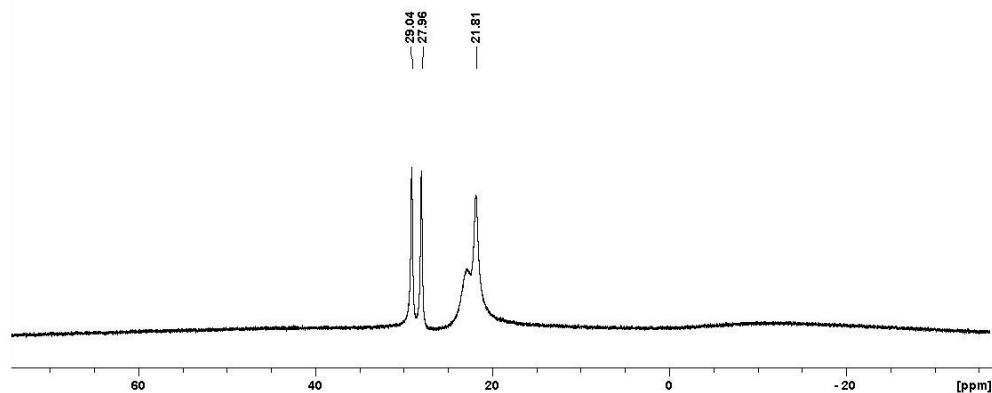

**Figure S46:** <sup>11</sup>B NMR spectrum ([C<sub>6</sub>D<sub>6</sub>], 160.5 MHz) of 2-(di-p-tolylmethoxy)-4,4,5,5-tetramethyl-1,3,2-dioxaborolane

**<sup>1</sup>H NMR (C<sub>6</sub>D<sub>6</sub>, 500 MHz):** δ 6.47 (s, 1H, *CHOBpin*). (**NMR Yield at 20 h: 32 %** with respect to HBpin consumption from <sup>11</sup>B NMR); **<sup>13</sup>C NMR (C<sub>6</sub>D<sub>6</sub>, 126 MHz):** δ 78 (s, *CHOBpin*); **<sup>11</sup>B NMR (C<sub>6</sub>D<sub>6</sub>, 160.5 MHz):** 21.8 (s, *CHOBpin*).

## Hydrostannylation of 4,4'-dimethylbenzophenone

**2** (0.005 g, 0.004 mmol), 4,4'-dimethylbenzophenone (0.019g, 0.09 mmol), tributyltinhydride (24.94  $\mu$ l, 0.09 mmol) and mesitylene (4.3  $\mu$ l, 0.03 mmol).

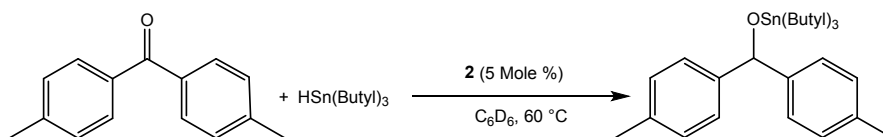

**Scheme S16:** Catalytic hydrostannylation of 4, 4'-dimethylbenzophenone.

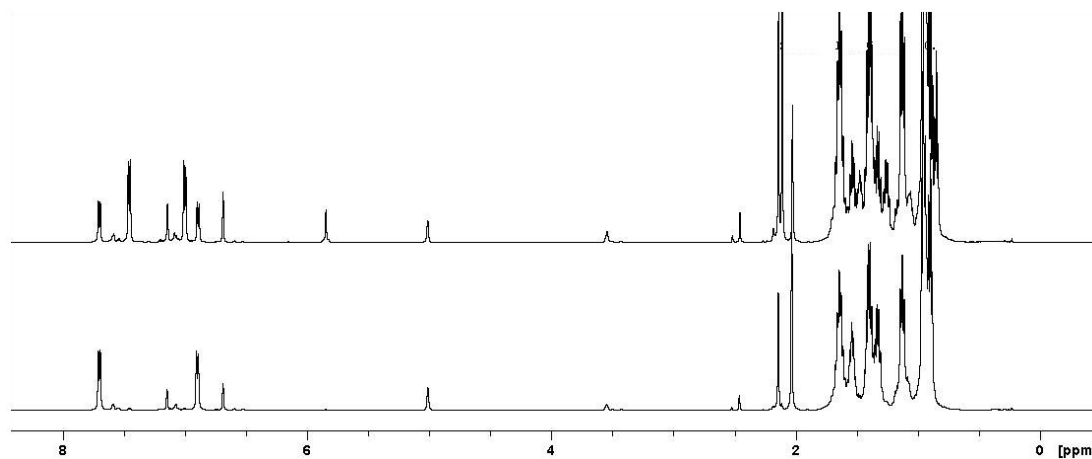

**Figure S47:** Stacking of  $^1\text{H}$  NMR spectra of hydrostannylation mixture ( $\text{HSn}(\text{Butyl})_3$  and 4,4'-dimethylbenzophenone) with catalyst before reaction (bottom) and after (top) the product formation recorded in  $\text{C}_6\text{D}_6$ .

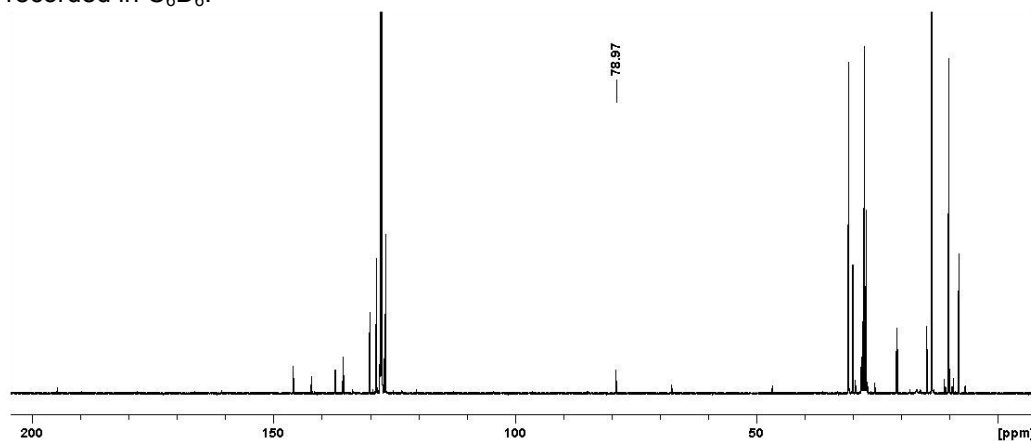

**Figure S48:**  $^{13}\text{C}$  NMR spectrum ( $[\text{C}_6\text{D}_6]$ , 126 MHz) of tributyl(di-p-tolylmethoxy)stannane.

$^1\text{H}$  NMR ( $\text{C}_6\text{D}_6$ , 500 MHz):  $\delta$  5.85 (s, 2H,  $\text{CHOSn}(\text{Butyl})_3$ ). (NMR Yield: 57.5 % with respect to the tributyltinhydride conversion);  $^{13}\text{C}$  NMR ( $\text{C}_6\text{D}_6$ , 126 MHz):  $\delta$  79 (s,  $\text{CHOSn}(\text{Butyl})_3$ ).

## OTHER NMR SPECTRA

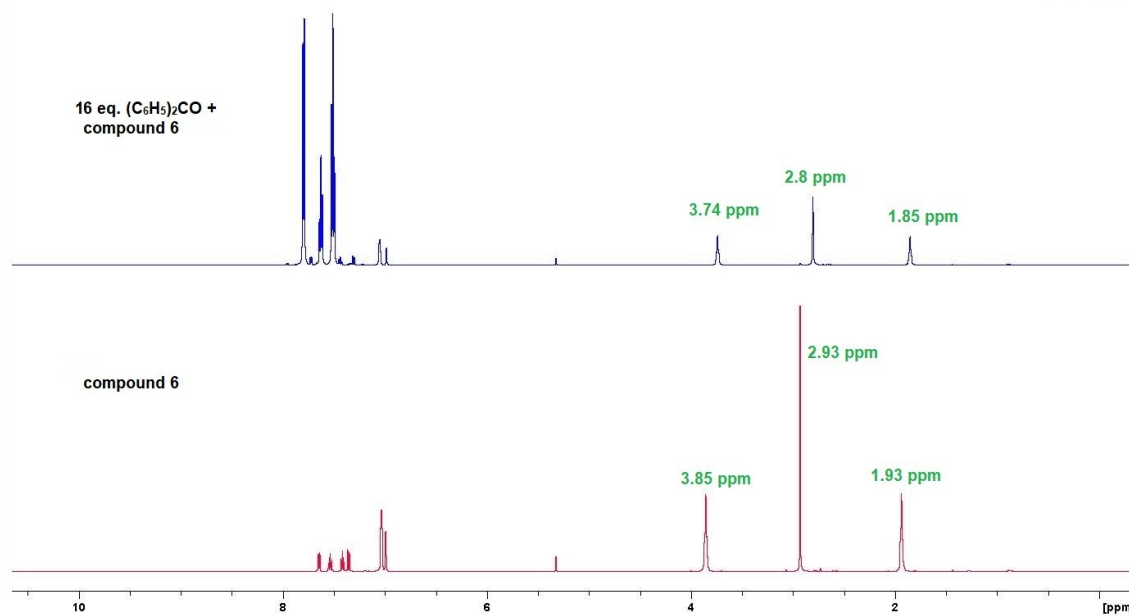

**Figure S49:** Stacking of <sup>1</sup>H NMR spectra of **2** (bottom) and **2**+16 eq. benzophenone (top) in CD<sub>2</sub>D<sub>2</sub>.

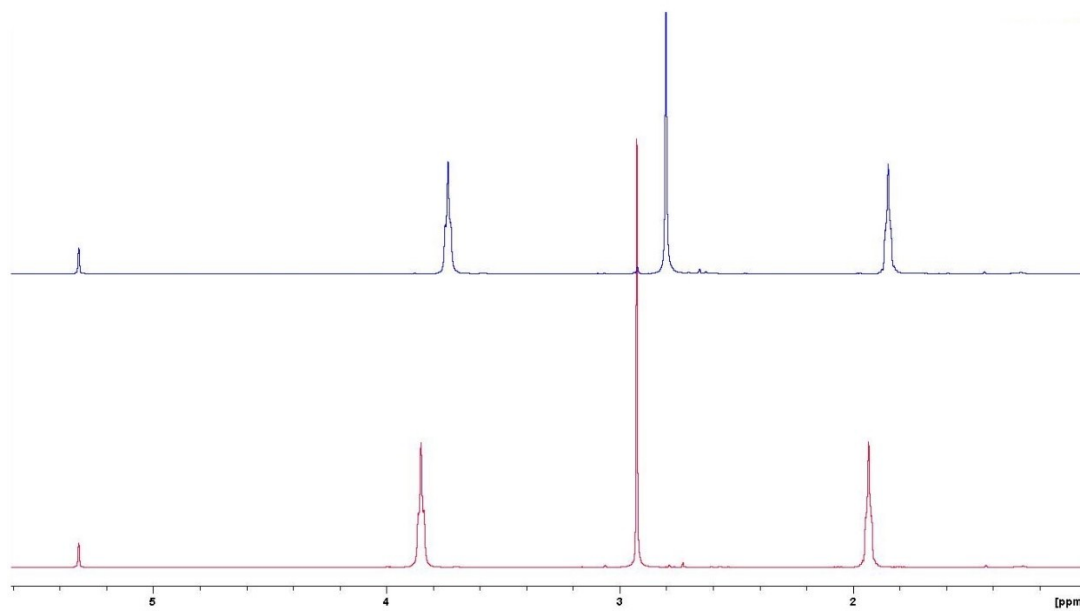

**Figure S49a:** Expanded form of stacked <sup>1</sup>H NMR spectra of **2** (bottom) and **2**+16 eq. benzophenone (top) in CD<sub>2</sub>D<sub>2</sub>.

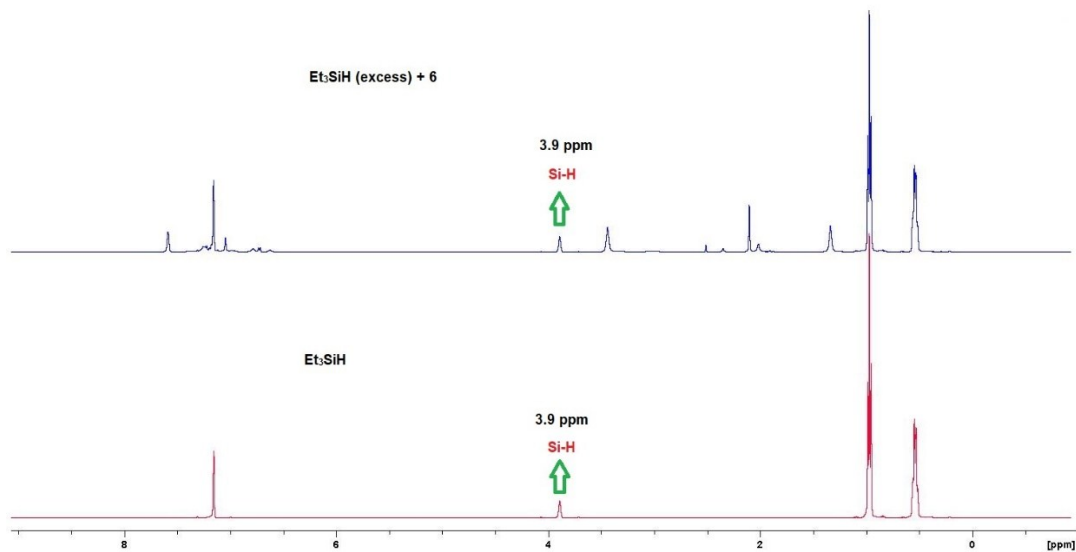

**Figure S50:** Stacking of <sup>1</sup>H NMR spectra of triethylsilane (bottom) and (top) triethylsilane + **2** in the ratio of 3:1 in C<sub>6</sub>D<sub>6</sub>.

**Table S3:** Reaction between Ph<sub>2</sub>C=O and Et<sub>3</sub>SiH in C<sub>6</sub>D<sub>6</sub> at 60 °C catalyzed by **2** (5 mol%).

| Et <sub>3</sub> SiH:Ph <sub>2</sub> C=O | Yield<br>(6h) |
|-----------------------------------------|---------------|
| 1:1                                     | 45            |
| 1:2                                     | 58            |
| 1:4                                     | 63            |
| 1:6                                     | 67            |
| 1:8                                     | 72            |
| 1:10                                    | 76            |

## Crystallographic Data

**Table S4.** Crystal data and structure refinement for **1**.

|                                   |                                                                                                     |
|-----------------------------------|-----------------------------------------------------------------------------------------------------|
| Identification code               | compound_1                                                                                          |
| CCDC Code                         | 1959215                                                                                             |
| Empirical formula                 | C <sub>16</sub> H <sub>20</sub> Al Cl N <sub>2</sub>                                                |
| Formula weight                    | 302.77                                                                                              |
| Temperature                       | 150(2) K                                                                                            |
| Wavelength                        | 0.71073 Å                                                                                           |
| Crystal system                    | Orthorhombic                                                                                        |
| Space group                       | P c c n                                                                                             |
| Unit cell dimensions              | a = 17.9517(6) Å      α = 90°.<br>b = 22.8784(10) Å     β = 90°.<br>c = 7.7265(2) Å        γ = 90°. |
| Volume                            | 3173.32(19) Å <sup>3</sup>                                                                          |
| Z                                 | 8                                                                                                   |
| Density (calculated)              | 1.267 Mg/m <sup>3</sup>                                                                             |
| Absorption coefficient            | 0.288 mm <sup>-1</sup>                                                                              |
| F(000)                            | 1280                                                                                                |
| Crystal size                      | 0.120 x 0.100 x 0.080 mm <sup>3</sup>                                                               |
| Theta range for data collection   | 2.902 to 24.998°.                                                                                   |
| Index ranges                      | -21 ≤ h ≤ 20, -27 ≤ k ≤ 17, -8 ≤ l ≤ 9                                                              |
| Reflections collected             | 12071                                                                                               |
| Independent reflections           | 2795 [R(int) = 0.0386]                                                                              |
| Completeness to theta = 24.998°   | 99.9 %                                                                                              |
| Absorption correction             | Semi-empirical from equivalents                                                                     |
| Max. and min. transmission        | 0.977 and 0.966                                                                                     |
| Refinement method                 | Full-matrix least-squares on F <sup>2</sup>                                                         |
| Data / restraints / parameters    | 2795 / 0 / 181                                                                                      |
| Goodness-of-fit on F <sup>2</sup> | 1.011                                                                                               |
| Final R indices [I > 2σ(I)]       | R1 = 0.0354, wR2 = 0.0786                                                                           |
| R indices (all data)              | R1 = 0.0552, wR2 = 0.0890                                                                           |
| Extinction coefficient            | n/a                                                                                                 |
| Largest diff. peak and hole       | 0.262 and -0.183 e.Å <sup>-3</sup>                                                                  |



**Table S5.** Crystal data and structure refinement for **2**.

|                                   |                                                                                    |                  |
|-----------------------------------|------------------------------------------------------------------------------------|------------------|
| Identification code               | compound_2                                                                         |                  |
| CCDC Code                         | 1959217                                                                            |                  |
| Empirical formula                 | C <sub>50</sub> H <sub>52</sub> Al B Cl <sub>8</sub> N <sub>2</sub> O <sub>2</sub> |                  |
| Formula weight                    | 1034.32                                                                            |                  |
| Temperature                       | 150(2) K                                                                           |                  |
| Wavelength                        | 0.71073 Å                                                                          |                  |
| Crystal system                    | Monoclinic                                                                         |                  |
| Space group                       | P 21/c                                                                             |                  |
| Unit cell dimensions              | a = 17.421(6) Å                                                                    | α = 90°.         |
|                                   | b = 16.199(5) Å                                                                    | β = 95.551(12)°. |
|                                   | c = 17.674(6) Å                                                                    | γ = 90°.         |
| Volume                            | 4964(3) Å <sup>3</sup>                                                             |                  |
| Z                                 | 4                                                                                  |                  |
| Density (calculated)              | 1.384 Mg/m <sup>3</sup>                                                            |                  |
| Absorption coefficient            | 0.513 mm <sup>-1</sup>                                                             |                  |
| F(000)                            | 2144                                                                               |                  |
| Crystal size                      | 0.200 x 0.200 x 0.150 mm <sup>3</sup>                                              |                  |
| Theta range for data collection   | 1.174 to 24.994°.                                                                  |                  |
| Index ranges                      | -20 ≤ h ≤ 20, -19 ≤ k ≤ 19, -21 ≤ l ≤ 21                                           |                  |
| Reflections collected             | 60479                                                                              |                  |
| Independent reflections           | 8730 [R(int) = 0.0813]                                                             |                  |
| Completeness to theta = 24.994°   | 99.9 %                                                                             |                  |
| Absorption correction             | Semi-empirical from equivalents                                                    |                  |
| Max. and min. transmission        | 0.927 and 0.904                                                                    |                  |
| Refinement method                 | Full-matrix least-squares on F <sup>2</sup>                                        |                  |
| Data / restraints / parameters    | 8730 / 0 / 581                                                                     |                  |
| Goodness-of-fit on F <sup>2</sup> | 1.014                                                                              |                  |
| Final R indices [I > 2σ(I)]       | R1 = 0.0448, wR2 = 0.1087                                                          |                  |
| R indices (all data)              | R1 = 0.0698, wR2 = 0.1233                                                          |                  |
| Extinction coefficient            | n/a                                                                                |                  |
| Largest diff. peak and hole       | 0.708 and -0.360 e.Å <sup>-3</sup>                                                 |                  |

**Table S6.** Crystal data and structure refinement for **3**.

|                                   |                                                                                                   |
|-----------------------------------|---------------------------------------------------------------------------------------------------|
| Identification code               | compound_3                                                                                        |
| CCDC Code                         | 1959216                                                                                           |
| Empirical formula                 | C <sub>52</sub> H <sub>62</sub> Al B Cl <sub>8</sub> N <sub>2</sub> O <sub>2</sub> P <sub>2</sub> |
| Formula weight                    | 1130.36                                                                                           |
| Temperature                       | 150(2) K                                                                                          |
| Wavelength                        | 0.71073 Å                                                                                         |
| Crystal system                    | Orthorhombic                                                                                      |
| Space group                       | P 21 21 21                                                                                        |
| Unit cell dimensions              | a = 14.079(5) Å      α = 90°<br>b = 17.811(6) Å      β = 90°<br>c = 22.443(7) Å      γ = 90°      |
| Volume                            | 5628(3) Å <sup>3</sup>                                                                            |
| Z                                 | 4                                                                                                 |
| Density (calculated)              | 1.334 Mg/m <sup>3</sup>                                                                           |
| Absorption coefficient            | 0.513 mm <sup>-1</sup>                                                                            |
| F(000)                            | 2352                                                                                              |
| Crystal size                      | 0.120 x 0.080 x 0.075 mm <sup>3</sup>                                                             |
| Theta range for data collection   | 1.815 to 25.998°                                                                                  |
| Index ranges                      | -17<=h<=16, -21<=k<=21, -27<=l<=27                                                                |
| Reflections collected             | 82574                                                                                             |
| Independent reflections           | 11056 [R(int) = 0.1664]                                                                           |
| Completeness to theta = 25.242°   | 99.9 %                                                                                            |
| Absorption correction             | Semi-empirical from equivalents                                                                   |
| Max. and min. transmission        | 0.963 and 0.941                                                                                   |
| Refinement method                 | Full-matrix least-squares on F <sup>2</sup>                                                       |
| Data / restraints / parameters    | 11056 / 253 / 551                                                                                 |
| Goodness-of-fit on F <sup>2</sup> | 1.019                                                                                             |
| Final R indices [I>2sigma(I)]     | R1 = 0.0664, wR2 = 0.1282                                                                         |
| R indices (all data)              | R1 = 0.1434, wR2 = 0.1647                                                                         |
| Absolute structure parameter      | 0.04(5)                                                                                           |
| Extinction coefficient            | n/a                                                                                               |
| Largest diff. peak and hole       | 0.450 and -0.550 e.Å <sup>-3</sup>                                                                |

**Table S7.** Crystal data and structure refinement for **4**

|                                   |                                                                                                        |
|-----------------------------------|--------------------------------------------------------------------------------------------------------|
| Identification code               | compound_4                                                                                             |
| CCDC Code                         | 1959218                                                                                                |
| Empirical formula                 | C <sub>52</sub> H <sub>68</sub> Al B Cl <sub>8</sub> N <sub>8</sub> O <sub>2</sub> P <sub>2</sub>      |
| Formula weight                    | 1220.47                                                                                                |
| Temperature                       | 150(2) K                                                                                               |
| Wavelength                        | 0.71073 Å                                                                                              |
| Crystal system                    | Monoclinic                                                                                             |
| Space group                       | P 21/c                                                                                                 |
| Unit cell dimensions              | a = 13.7249(5) Å      α = 90°<br>b = 12.1252(4) Å      β = 92.707(2)°<br>c = 36.2951(12) Å     γ = 90° |
| Volume                            | 6033.4(4) Å <sup>3</sup>                                                                               |
| Z                                 | 4                                                                                                      |
| Density (calculated)              | 1.344 Mg/m <sup>3</sup>                                                                                |
| Absorption coefficient            | 0.487 mm <sup>-1</sup>                                                                                 |
| F(000)                            | 2544                                                                                                   |
| Crystal size                      | 0.240 x 0.185 x 0.120 mm <sup>3</sup>                                                                  |
| Theta range for data collection   | 1.771 to 25.998°                                                                                       |
| Index ranges                      | -16 ≤ h ≤ 16, -14 ≤ k ≤ 14, -44 ≤ l ≤ 44                                                               |
| Reflections collected             | 86993                                                                                                  |
| Independent reflections           | 11842 [R(int) = 0.1179]                                                                                |
| Completeness to theta = 25.242°   | 99.9 %                                                                                                 |
| Absorption correction             | Semi-empirical from equivalents                                                                        |
| Max. and min. transmission        | 0.944 and 0.892                                                                                        |
| Refinement method                 | Full-matrix least-squares on F <sup>2</sup>                                                            |
| Data / restraints / parameters    | 11842 / 430 / 863                                                                                      |
| Goodness-of-fit on F <sup>2</sup> | 1.001                                                                                                  |
| Final R indices [I > 2σ(I)]       | R1 = 0.0690, wR2 = 0.1763                                                                              |
| R indices (all data)              | R1 = 0.1256, wR2 = 0.2205                                                                              |
| Extinction coefficient            | n/a                                                                                                    |
| Largest diff. peak and hole       | 0.848 and -0.512 e.Å <sup>-3</sup>                                                                     |

### Computational Details:

All DFT computations were performed using Gaussian 09<sup>[5]</sup> quantum chemistry program package for molecular geometry optimization and energy calculations. Density functional theory (DFT) with the meta-hybrid functional M06-2X<sup>[6]</sup> and the correlation-consistent polarized valence split basis set, cc-pVTZ<sup>[7]</sup> for all atoms were used. Hessian matrix of force constants of stationary points were calculated to characterize intermediates and transition state on potential energy surface. Zero-point corrected energies are reported for all isomers. Natural bond orbital (NBO)<sup>[8]</sup> analysis was carried out using NBO 6.0 as implemented in the Gaussian 09 program package to calculate charges on C and O atoms using the same level of theory (M06-2X/cc-pVTZ).

### DFT Optimized coordinates of molecules

Cartesian coordinates and zero-point corrected total energies (a.u.) of DFT optimized structures using M06-2X functional and cc-pVTZ basis set for all atoms.

#### Compound 1

$E_{\text{TOTAL}} = -1433.595584$  a.u.

|   |              |              |              |
|---|--------------|--------------|--------------|
| 6 | -0.553554000 | 1.669503000  | -0.343643000 |
| 6 | 0.716066000  | 2.234303000  | -0.324160000 |
| 6 | 1.028731000  | 3.478970000  | -0.850225000 |
| 1 | 2.035182000  | 3.878054000  | -0.809076000 |
| 6 | 0.000000000  | 4.205291000  | -1.430866000 |
| 1 | 0.198770000  | 5.181948000  | -1.851522000 |
| 6 | -1.289195000 | 3.681252000  | -1.472491000 |
| 1 | -2.082749000 | 4.260075000  | -1.927153000 |
| 6 | -1.562815000 | 2.429291000  | -0.937455000 |
| 1 | -2.578975000 | 2.055745000  | -0.987128000 |
| 6 | 2.310925000  | 1.954590000  | 1.502587000  |
| 1 | 2.982994000  | 2.766118000  | 1.208117000  |
| 1 | 2.876510000  | 1.191180000  | 2.034514000  |
| 1 | 1.539486000  | 2.337034000  | 2.164923000  |
| 6 | 2.703585000  | 0.859006000  | -0.611694000 |
| 1 | 2.218146000  | 0.406146000  | -1.474018000 |
| 1 | 3.310232000  | 0.107057000  | -0.107757000 |
| 1 | 3.350306000  | 1.675119000  | -0.947291000 |
| 6 | 0.553554000  | -1.669503000 | -0.343643000 |

|    |              |              |              |
|----|--------------|--------------|--------------|
| 6  | -0.716066000 | -2.234303000 | -0.324160000 |
| 6  | -1.028731000 | -3.478970000 | -0.850225000 |
| 1  | -2.035182000 | -3.878054000 | -0.809076000 |
| 6  | 0.000000000  | -4.205291000 | -1.430866000 |
| 1  | -0.198770000 | -5.181948000 | -1.851522000 |
| 6  | 1.289195000  | -3.681252000 | -1.472491000 |
| 1  | 2.082749000  | -4.260075000 | -1.927153000 |
| 6  | 1.562815000  | -2.429291000 | -0.937455000 |
| 1  | 2.578975000  | -2.055745000 | -0.987128000 |
| 6  | -2.703585000 | -0.859006000 | -0.611694000 |
| 1  | -2.218146000 | -0.406146000 | -1.474018000 |
| 1  | -3.310232000 | -0.107057000 | -0.107757000 |
| 1  | -3.350306000 | -1.675119000 | -0.947291000 |
| 6  | -2.310925000 | -1.954590000 | 1.502587000  |
| 1  | -2.982994000 | -2.766118000 | 1.208117000  |
| 1  | -2.876510000 | -1.191180000 | 2.034514000  |
| 1  | -1.539486000 | -2.337034000 | 2.164923000  |
| 7  | 1.681198000  | 1.345891000  | 0.322979000  |
| 7  | -1.681198000 | -1.345891000 | 0.322979000  |
| 13 | 0.000000000  | 0.000000000  | 0.584607000  |
| 17 | 0.000000000  | 0.000000000  | 2.758032000  |

## Compound 2

$E_{\text{TOTAL}} = -1437.802646$  a.u.

|   |              |             |              |
|---|--------------|-------------|--------------|
| 6 | -0.373098000 | 1.791246000 | -0.720912000 |
| 6 | -1.260140000 | 2.181608000 | 0.279761000  |
| 6 | -2.056367000 | 3.315948000 | 0.212323000  |
| 1 | -2.735282000 | 3.579885000 | 1.013945000  |
| 6 | -1.961766000 | 4.110578000 | -0.920337000 |
| 1 | -2.568379000 | 5.001565000 | -1.006718000 |
| 6 | -1.087581000 | 3.762033000 | -1.944656000 |
| 1 | -1.023499000 | 4.387089000 | -2.825360000 |
| 6 | -0.307521000 | 2.616357000 | -1.847751000 |
| 1 | 0.343722000  | 2.373430000 | -2.679932000 |
| 6 | -0.628528000 | 1.885707000 | 2.586482000  |
| 1 | -0.511107000 | 1.140661000 | 3.373376000  |

|   |              |              |              |
|---|--------------|--------------|--------------|
| 1 | 0.343832000  | 2.292519000  | 2.318484000  |
| 1 | -1.249440000 | 2.700607000  | 2.971283000  |
| 6 | -2.571321000 | 0.744721000  | 1.796213000  |
| 1 | -2.436478000 | -0.021455000 | 2.558889000  |
| 1 | -3.214313000 | 1.535187000  | 2.193190000  |
| 1 | -3.060845000 | 0.281670000  | 0.944989000  |
| 6 | -0.712602000 | -1.699249000 | 0.700243000  |
| 6 | -1.654394000 | -1.912802000 | -0.304430000 |
| 6 | -2.667641000 | -2.857651000 | -0.229027000 |
| 1 | -3.384275000 | -2.985483000 | -1.030901000 |
| 6 | -2.743462000 | -3.639267000 | 0.914762000  |
| 1 | -3.522039000 | -4.383682000 | 1.009565000  |
| 6 | -1.819769000 | -3.466299000 | 1.940276000  |
| 1 | -1.887400000 | -4.081010000 | 2.827938000  |
| 6 | -0.821476000 | -2.505467000 | 1.835894000  |
| 1 | -0.137488000 | -2.391191000 | 2.669155000  |
| 6 | -0.916672000 | -1.775526000 | -2.593671000 |
| 1 | -0.650116000 | -1.078783000 | -3.388453000 |
| 1 | -0.039212000 | -2.344177000 | -2.294354000 |
| 1 | -1.664195000 | -2.473334000 | -2.983345000 |
| 6 | -2.629294000 | -0.273602000 | -1.874796000 |
| 1 | -2.327323000 | 0.440618000  | -2.640224000 |
| 1 | -3.399561000 | -0.932112000 | -2.285771000 |
| 1 | -3.046006000 | 0.287086000  | -1.043571000 |
| 6 | 1.999375000  | 0.132089000  | -2.343658000 |
| 1 | 2.123594000  | 1.164842000  | -2.025587000 |
| 1 | 1.255146000  | 0.086565000  | -3.137872000 |
| 6 | 3.299281000  | -0.564661000 | -2.718748000 |
| 1 | 3.506047000  | -0.488122000 | -3.782710000 |
| 1 | 4.137306000  | -0.125120000 | -2.176750000 |
| 6 | 3.061427000  | -2.000017000 | -2.249417000 |
| 1 | 3.979977000  | -2.562801000 | -2.106217000 |
| 1 | 2.430782000  | -2.538071000 | -2.957592000 |
| 6 | 2.317236000  | -1.778587000 | -0.948677000 |
| 1 | 1.666475000  | -2.593180000 | -0.636797000 |
| 1 | 2.999486000  | -1.522632000 | -0.133201000 |
| 6 | 1.909188000  | -0.513070000 | 2.356431000  |

|    |              |              |              |
|----|--------------|--------------|--------------|
| 1  | 1.867390000  | -1.548982000 | 2.027219000  |
| 1  | 1.166838000  | -0.354180000 | 3.137270000  |
| 6  | 3.297147000  | -0.042604000 | 2.765130000  |
| 1  | 4.063977000  | -0.599342000 | 2.225308000  |
| 1  | 3.470110000  | -0.172865000 | 3.830011000  |
| 6  | 3.298480000  | 1.420969000  | 2.324670000  |
| 1  | 2.743034000  | 2.036113000  | 3.033042000  |
| 1  | 4.296522000  | 1.836237000  | 2.213514000  |
| 6  | 2.558626000  | 1.344641000  | 1.004729000  |
| 1  | 2.050421000  | 2.256796000  | 0.699055000  |
| 1  | 3.211584000  | 1.001926000  | 0.196766000  |
| 7  | -1.251524000 | 1.261366000  | 1.411695000  |
| 7  | -1.444240000 | -1.026758000 | -1.444941000 |
| 8  | 1.480846000  | -0.627249000 | -1.217239000 |
| 8  | 1.546457000  | 0.333629000  | 1.231110000  |
| 13 | 0.052144000  | -0.012472000 | -0.008531000 |

### Compound 3

$E_{\text{TOTAL}} = -2281.329491$  a.u.

|   |              |             |              |
|---|--------------|-------------|--------------|
| 6 | -0.462963000 | 1.986681000 | -1.640513000 |
| 6 | -0.008694000 | 3.233384000 | -1.224652000 |
| 6 | -0.162364000 | 4.395967000 | -1.966936000 |
| 1 | 0.204356000  | 5.349656000 | -1.607070000 |
| 6 | -0.797038000 | 4.303704000 | -3.196851000 |
| 1 | -0.933786000 | 5.190289000 | -3.801012000 |
| 6 | -1.248280000 | 3.071521000 | -3.660681000 |
| 1 | -1.727070000 | 3.009781000 | -4.629060000 |
| 6 | -1.080606000 | 1.927674000 | -2.891273000 |
| 1 | -1.426202000 | 0.981691000 | -3.295685000 |
| 6 | 2.074079000  | 3.568983000 | -0.029365000 |
| 1 | 2.568602000  | 3.350927000 | 0.917817000  |
| 1 | 2.557873000  | 3.003802000 | -0.822351000 |
| 1 | 2.176641000  | 4.638692000 | -0.239160000 |
| 6 | -0.014109000 | 3.961457000 | 1.095421000  |
| 1 | 0.470025000  | 3.790758000 | 2.055941000  |
| 1 | 0.015252000  | 5.030655000 | 0.862556000  |

|    |              |              |              |
|----|--------------|--------------|--------------|
| 1  | -1.051575000 | 3.643627000  | 1.176221000  |
| 6  | -0.439627000 | 0.835447000  | 1.805822000  |
| 6  | -1.696316000 | 0.516940000  | 2.351556000  |
| 6  | -1.858520000 | 0.367603000  | 3.730535000  |
| 1  | -2.822537000 | 0.126392000  | 4.153136000  |
| 6  | -0.786782000 | 0.547904000  | 4.595345000  |
| 1  | -0.935723000 | 0.429997000  | 5.660279000  |
| 6  | 0.452270000  | 0.899378000  | 4.093196000  |
| 1  | 1.288532000  | 1.063276000  | 4.759643000  |
| 6  | 0.601096000  | 1.040046000  | 2.717295000  |
| 1  | 1.581845000  | 1.319161000  | 2.337933000  |
| 6  | -3.986266000 | -0.276989000 | 2.055539000  |
| 1  | -4.703706000 | -0.503621000 | 1.264276000  |
| 1  | -3.720957000 | -1.204706000 | 2.562055000  |
| 1  | -4.494365000 | 0.378846000  | 2.774574000  |
| 6  | -3.200315000 | 1.561218000  | 0.767553000  |
| 1  | -3.966914000 | 1.329599000  | 0.026264000  |
| 1  | -3.612166000 | 2.301397000  | 1.466098000  |
| 1  | -2.357990000 | 2.004464000  | 0.244949000  |
| 7  | 0.666947000  | 3.170443000  | 0.064374000  |
| 7  | -2.808036000 | 0.334677000  | 1.463394000  |
| 8  | -0.251596000 | -0.871845000 | -0.642634000 |
| 8  | 1.931912000  | 0.583208000  | -0.118993000 |
| 13 | 0.129169000  | 0.899246000  | -0.099598000 |
| 15 | -1.361027000 | -1.914097000 | -0.830025000 |
| 6  | -0.717862000 | -3.110116000 | -2.037306000 |
| 1  | 0.344334000  | -3.186300000 | -1.790076000 |
| 1  | -0.774037000 | -2.626252000 | -3.015460000 |
| 6  | -1.685508000 | -2.775652000 | 0.728921000  |
| 1  | -0.865797000 | -3.482704000 | 0.879770000  |
| 1  | -1.591169000 | -2.001987000 | 1.494937000  |
| 6  | -2.888655000 | -1.168747000 | -1.456197000 |
| 1  | -3.433083000 | -0.832350000 | -0.575304000 |
| 1  | -2.564362000 | -0.267099000 | -1.980312000 |
| 6  | -3.041024000 | -3.476714000 | 0.813063000  |
| 1  | -3.142170000 | -4.269526000 | 0.073747000  |
| 1  | -3.164215000 | -3.923488000 | 1.798015000  |



|    |              |              |              |
|----|--------------|--------------|--------------|
| 1  | -3.856468000 | -2.769760000 | 0.667825000  |
| 6  | -1.352176000 | -4.499758000 | -2.061850000 |
| 1  | -0.857707000 | -5.114421000 | -2.811712000 |
| 1  | -1.242484000 | -5.001314000 | -1.100947000 |
| 1  | -2.410746000 | -4.466067000 | -2.309841000 |
| 6  | -3.755139000 | -2.050920000 | -2.353914000 |
| 1  | -4.625343000 | -1.485890000 | -2.682473000 |
| 1  | -3.218573000 | -2.375582000 | -3.244717000 |
| 1  | -4.115897000 | -2.934891000 | -1.829931000 |
| 15 | 2.858333000  | -0.639486000 | -0.084300000 |
| 6  | 2.278024000  | -1.863667000 | 1.121749000  |
| 1  | 1.495704000  | -2.439351000 | 0.624089000  |
| 1  | 1.779452000  | -1.274428000 | 1.896766000  |
| 6  | 4.495029000  | -0.030466000 | 0.389939000  |
| 1  | 4.556078000  | 0.952462000  | -0.082347000 |
| 1  | 4.461906000  | 0.144529000  | 1.467969000  |
| 6  | 2.930069000  | -1.387415000 | -1.732627000 |
| 1  | 3.552311000  | -0.734525000 | -2.348522000 |
| 1  | 1.908204000  | -1.291996000 | -2.107020000 |
| 6  | 3.406384000  | -2.837585000 | -1.794292000 |
| 1  | 3.369932000  | -3.193809000 | -2.822194000 |
| 1  | 4.430311000  | -2.950090000 | -1.442629000 |
| 1  | 2.773161000  | -3.491421000 | -1.193921000 |
| 6  | 5.693461000  | -0.892065000 | -0.005289000 |
| 1  | 5.755896000  | -1.008297000 | -1.086647000 |
| 1  | 6.611933000  | -0.411340000 | 0.325354000  |
| 1  | 5.658419000  | -1.882549000 | 0.444399000  |
| 6  | 3.352145000  | -2.768190000 | 1.723644000  |
| 1  | 3.850748000  | -3.375212000 | 0.969395000  |
| 1  | 4.109754000  | -2.188538000 | 2.249331000  |
| 1  | 2.898222000  | -3.443428000 | 2.446338000  |

#### Compound 4

ETOTAL = -2613.374270 a.u.

|   |             |             |              |
|---|-------------|-------------|--------------|
| 6 | 0.841179000 | 1.950615000 | -1.247765000 |
| 6 | 2.135288000 | 2.475811000 | -1.090757000 |

|   |              |              |              |
|---|--------------|--------------|--------------|
| 6 | 2.771786000  | 3.120384000  | -2.152453000 |
| 1 | 3.767661000  | 3.522865000  | -2.038159000 |
| 6 | 2.133477000  | 3.267083000  | -3.377448000 |
| 1 | 2.644870000  | 3.767699000  | -4.188844000 |
| 6 | 0.846423000  | 2.790251000  | -3.548503000 |
| 1 | 0.338770000  | 2.909954000  | -4.496161000 |
| 6 | 0.222628000  | 2.145906000  | -2.485485000 |
| 1 | -0.781611000 | 1.761706000  | -2.635741000 |
| 6 | 4.235089000  | 2.474241000  | 0.138009000  |
| 1 | 4.645909000  | 2.184746000  | 1.105441000  |
| 1 | 4.661305000  | 1.830320000  | -0.631310000 |
| 1 | 4.557979000  | 3.507197000  | -0.050756000 |
| 6 | 2.224206000  | 3.164878000  | 1.218981000  |
| 1 | 2.749503000  | 2.981591000  | 2.156505000  |
| 1 | 2.319152000  | 4.232215000  | 0.974902000  |
| 1 | 1.173961000  | 2.933173000  | 1.378808000  |
| 6 | -0.895073000 | 1.193475000  | 1.792945000  |
| 6 | -1.828893000 | 2.212074000  | 1.600205000  |
| 6 | -2.643053000 | 2.681589000  | 2.625154000  |
| 1 | -3.358069000 | 3.476238000  | 2.449468000  |
| 6 | -2.527816000 | 2.112360000  | 3.886273000  |
| 1 | -3.152442000 | 2.464446000  | 4.696217000  |
| 6 | -1.608382000 | 1.092781000  | 4.111378000  |
| 1 | -1.523585000 | 0.655804000  | 5.097797000  |
| 6 | -0.801191000 | 0.643508000  | 3.072727000  |
| 1 | -0.095593000 | -0.159096000 | 3.267690000  |
| 6 | -3.205843000 | 2.635288000  | -0.358370000 |
| 1 | -3.129462000 | 2.908556000  | -1.412068000 |
| 1 | -3.577609000 | 1.613916000  | -0.290196000 |
| 1 | -3.932855000 | 3.308045000  | 0.114050000  |
| 6 | -1.362476000 | 4.084244000  | 0.125120000  |
| 1 | -1.261471000 | 4.331103000  | -0.931915000 |
| 1 | -2.021484000 | 4.819244000  | 0.603907000  |
| 1 | -0.378383000 | 4.148711000  | 0.582147000  |
| 7 | 2.792555000  | 2.318644000  | 0.172509000  |
| 7 | -1.882944000 | 2.723071000  | 0.245551000  |
| 8 | -1.451525000 | -0.015220000 | -0.949292000 |

|    |              |              |              |
|----|--------------|--------------|--------------|
| 8  | 0.909429000  | -0.711227000 | 0.281928000  |
| 13 | -0.130469000 | 0.803804000  | 0.019673000  |
| 15 | 2.171168000  | -1.546832000 | 0.392116000  |
| 15 | -2.425245000 | -1.168342000 | -0.757482000 |
| 7  | 3.328641000  | -0.723705000 | 1.207254000  |
| 7  | 1.840283000  | -2.945418000 | 1.203873000  |
| 7  | 2.700087000  | -1.957424000 | -1.107353000 |
| 7  | -1.639542000 | -2.533661000 | -1.276066000 |
| 7  | -2.906640000 | -1.531025000 | 0.763844000  |
| 7  | -3.799949000 | -0.775846000 | -1.572171000 |
| 6  | 2.980613000  | 0.036105000  | 2.401781000  |
| 1  | 2.991509000  | -0.586152000 | 3.302621000  |
| 1  | 3.709773000  | 0.834430000  | 2.529003000  |
| 1  | 1.999601000  | 0.492774000  | 2.287444000  |
| 6  | 4.745288000  | -1.014868000 | 1.043608000  |
| 1  | 5.303390000  | -0.078893000 | 1.019631000  |
| 1  | 5.136199000  | -1.626328000 | 1.862387000  |
| 1  | 4.920439000  | -1.538248000 | 0.106185000  |
| 6  | 3.411039000  | -3.192508000 | -1.398573000 |
| 1  | 3.391963000  | -3.864267000 | -0.544140000 |
| 1  | 2.948161000  | -3.696093000 | -2.250113000 |
| 1  | 4.455154000  | -2.989491000 | -1.652890000 |
| 6  | 2.827466000  | -0.937706000 | -2.145499000 |
| 1  | 3.872652000  | -0.640742000 | -2.273264000 |
| 1  | 2.465125000  | -1.340154000 | -3.093496000 |
| 1  | 2.243118000  | -0.054588000 | -1.895626000 |
| 6  | 0.854647000  | -3.872339000 | 0.665671000  |
| 1  | 0.146986000  | -3.337944000 | 0.034829000  |
| 1  | 1.328899000  | -4.673618000 | 0.088192000  |
| 1  | 0.302859000  | -4.329091000 | 1.489311000  |
| 6  | 2.738554000  | -3.539230000 | 2.183383000  |
| 1  | 3.338634000  | -4.344179000 | 1.746373000  |
| 1  | 3.406232000  | -2.791451000 | 2.599890000  |
| 1  | 2.149426000  | -3.961136000 | 2.998626000  |
| 6  | -1.988549000 | -2.265689000 | 1.645405000  |
| 1  | -0.966843000 | -1.889303000 | 1.576601000  |
| 1  | -2.327400000 | -2.127060000 | 2.669453000  |

|   |              |              |              |
|---|--------------|--------------|--------------|
| 1 | -1.995649000 | -3.331778000 | 1.417457000  |
| 6 | -3.918702000 | -0.733007000 | 1.466043000  |
| 1 | -4.553659000 | -1.400119000 | 2.049706000  |
| 1 | -3.444911000 | -0.009473000 | 2.132905000  |
| 1 | -4.542059000 | -0.199619000 | 0.753974000  |
| 6 | -4.981492000 | -1.631018000 | -1.524280000 |
| 1 | -5.031584000 | -2.288770000 | -2.396060000 |
| 1 | -4.980978000 | -2.238481000 | -0.622521000 |
| 1 | -5.875435000 | -1.005540000 | -1.516310000 |
| 6 | -3.759940000 | 0.101684000  | -2.738919000 |
| 1 | -3.772268000 | -0.476810000 | -3.666349000 |
| 1 | -4.636128000 | 0.751845000  | -2.725525000 |
| 1 | -2.868230000 | 0.720024000  | -2.712142000 |
| 6 | -0.637568000 | -2.427552000 | -2.335946000 |
| 1 | -1.092377000 | -2.514507000 | -3.327339000 |
| 1 | -0.108568000 | -1.481328000 | -2.261927000 |
| 1 | 0.085326000  | -3.238520000 | -2.219892000 |
| 6 | -2.350259000 | -3.807888000 | -1.287954000 |
| 1 | -3.104119000 | -3.834552000 | -0.503739000 |
| 1 | -2.836995000 | -3.987266000 | -2.251114000 |
| 1 | -1.638885000 | -4.617535000 | -1.110734000 |

### INT-1

**E<sub>TOTAL</sub> = -1664.053808 a.u.**

|   |              |              |             |
|---|--------------|--------------|-------------|
| 6 | -1.355707000 | 0.730729000  | 1.747455000 |
| 6 | -2.195004000 | -0.315193000 | 2.114913000 |
| 6 | -3.044445000 | -0.278665000 | 3.211134000 |
| 1 | -3.684927000 | -1.115319000 | 3.462354000 |
| 6 | -3.053939000 | 0.873661000  | 3.983988000 |
| 1 | -3.703203000 | 0.938106000  | 4.846341000 |
| 6 | -2.234958000 | 1.948314000  | 3.650174000 |
| 1 | -2.257970000 | 2.843574000  | 4.257207000 |
| 6 | -1.400375000 | 1.879019000  | 2.541525000 |
| 1 | -0.797160000 | 2.749098000  | 2.298087000 |
| 6 | -1.438915000 | -2.602062000 | 1.854550000 |

|    |              |              |              |
|----|--------------|--------------|--------------|
| 1  | -1.187773000 | -3.347838000 | 1.099003000  |
| 1  | -0.532373000 | -2.282379000 | 2.361534000  |
| 1  | -2.114318000 | -3.056265000 | 2.585931000  |
| 6  | -3.339194000 | -1.868467000 | 0.591996000  |
| 1  | -3.132264000 | -2.637041000 | -0.151618000 |
| 1  | -4.030542000 | -2.269311000 | 1.338516000  |
| 1  | -3.810203000 | -1.030479000 | 0.084689000  |
| 6  | -1.354661000 | -0.736008000 | -1.747016000 |
| 6  | -2.197433000 | 0.307387000  | -2.113698000 |
| 6  | -3.047557000 | 0.268439000  | -3.209300000 |
| 1  | -3.690882000 | 1.103137000  | -3.459754000 |
| 6  | -3.054067000 | -0.883724000 | -3.982425000 |
| 1  | -3.703822000 | -0.950006000 | -4.844270000 |
| 6  | -2.231523000 | -1.955887000 | -3.649436000 |
| 1  | -2.252260000 | -2.851101000 | -4.256619000 |
| 6  | -1.396366000 | -1.884259000 | -2.541368000 |
| 1  | -0.790371000 | -2.752569000 | -2.298539000 |
| 6  | -1.448628000 | 2.596623000  | -1.853522000 |
| 1  | -1.199348000 | 3.343161000  | -1.098104000 |
| 1  | -0.541448000 | 2.279958000  | -2.361249000 |
| 1  | -2.125980000 | 3.048772000  | -2.584389000 |
| 6  | -3.345736000 | 1.856664000  | -0.589923000 |
| 1  | -3.140799000 | 2.624842000  | 0.154655000  |
| 1  | -4.038368000 | 2.256532000  | -1.335781000 |
| 1  | -3.814375000 | 1.016723000  | -0.083646000 |
| 7  | -2.072355000 | -1.446922000 | 1.202557000  |
| 7  | -2.077916000 | 1.439362000  | -1.201295000 |
| 13 | -0.768786000 | -0.002066000 | 0.000191000  |
| 6  | 3.022442000  | -3.517643000 | -1.047710000 |
| 6  | 3.995528000  | -4.452881000 | -0.742992000 |
| 6  | 4.308457000  | -4.705096000 | 0.586445000  |
| 6  | 3.656936000  | -4.029925000 | 1.617890000  |
| 6  | 2.686550000  | -3.096168000 | 1.320567000  |
| 6  | 2.368288000  | -2.838661000 | -0.017555000 |
| 1  | 2.763401000  | -3.308090000 | -2.078458000 |
| 1  | 4.507827000  | -4.983571000 | -1.532469000 |
| 1  | 5.068584000  | -5.436769000 | 0.825269000  |

|   |             |              |              |
|---|-------------|--------------|--------------|
| 1 | 3.912962000 | -4.240523000 | 2.646525000  |
| 1 | 2.167164000 | -2.557618000 | 2.101627000  |
| 6 | 1.350276000 | -1.874761000 | -0.366875000 |
| 1 | 1.137548000 | -1.718524000 | -1.432569000 |
| 8 | 0.710741000 | -1.229211000 | 0.465334000  |
| 6 | 3.010549000 | 3.526747000  | 1.046261000  |
| 6 | 2.357483000 | 2.846400000  | 0.016327000  |
| 6 | 2.672090000 | 3.107315000  | -1.322013000 |
| 6 | 3.637689000 | 4.045878000  | -1.619768000 |
| 6 | 4.288145000 | 4.722397000  | -0.588541000 |
| 6 | 3.978875000 | 4.466765000  | 0.741112000  |
| 1 | 2.754319000 | 3.314590000  | 2.077182000  |
| 1 | 2.153593000 | 2.567624000  | -2.102872000 |
| 1 | 3.890827000 | 4.259147000  | -2.648572000 |
| 1 | 5.044520000 | 5.457854000  | -0.827662000 |
| 1 | 4.490313000 | 4.998540000  | 1.530416000  |
| 6 | 1.344231000 | 1.877608000  | 0.366027000  |
| 1 | 1.133796000 | 1.719179000  | 1.431851000  |
| 8 | 0.706191000 | 1.230347000  | -0.465992000 |

## TS

**E<sub>TOTAL</sub> = -2009.451524 a.u.**

|   |              |              |              |
|---|--------------|--------------|--------------|
| 6 | -1.652725000 | -1.721773000 | -0.998051000 |
| 6 | -2.581460000 | -2.157702000 | -0.060172000 |
| 6 | -3.774235000 | -2.788614000 | -0.385460000 |
| 1 | -4.470784000 | -3.120834000 | 0.374620000  |
| 6 | -4.049785000 | -2.987156000 | -1.731623000 |
| 1 | -4.966593000 | -3.479991000 | -2.026155000 |
| 6 | -3.149334000 | -2.560476000 | -2.705529000 |
| 1 | -3.380447000 | -2.722802000 | -3.749888000 |
| 6 | -1.961948000 | -1.935693000 | -2.342636000 |
| 1 | -1.286207000 | -1.606078000 | -3.123836000 |
| 6 | -3.118741000 | -1.105777000 | 2.080940000  |
| 1 | -2.669576000 | -0.814784000 | 3.029546000  |
| 1 | -3.393415000 | -0.208964000 | 1.531641000  |
| 1 | -4.015894000 | -1.697230000 | 2.284627000  |

|    |              |              |              |
|----|--------------|--------------|--------------|
| 6  | -1.794143000 | -3.119558000 | 2.012579000  |
| 1  | -1.394742000 | -2.878350000 | 2.995342000  |
| 1  | -2.675563000 | -3.756648000 | 2.125109000  |
| 1  | -1.032168000 | -3.658224000 | 1.452814000  |
| 6  | 1.006382000  | -1.520687000 | 1.477716000  |
| 6  | 2.279430000  | -1.953107000 | 1.061001000  |
| 6  | 3.346936000  | -2.013796000 | 1.959188000  |
| 1  | 4.327825000  | -2.331838000 | 1.640790000  |
| 6  | 3.158810000  | -1.688914000 | 3.294717000  |
| 1  | 3.992260000  | -1.757220000 | 3.980530000  |
| 6  | 1.908616000  | -1.301117000 | 3.746152000  |
| 1  | 1.751629000  | -1.063602000 | 4.789759000  |
| 6  | 0.864694000  | -1.214972000 | 2.834036000  |
| 1  | -0.101225000 | -0.868248000 | 3.195050000  |
| 6  | 3.840381000  | -2.576854000 | -0.724958000 |
| 1  | 3.857830000  | -2.731273000 | -1.802765000 |
| 1  | 4.470378000  | -1.720708000 | -0.491872000 |
| 1  | 4.249356000  | -3.472091000 | -0.245330000 |
| 6  | 1.612944000  | -3.435859000 | -0.743623000 |
| 1  | 1.703709000  | -3.560982000 | -1.823213000 |
| 1  | 1.919819000  | -4.368536000 | -0.258719000 |
| 1  | 0.570815000  | -3.245305000 | -0.507778000 |
| 7  | -2.137252000 | -1.874483000 | 1.304195000  |
| 7  | 2.465659000  | -2.322942000 | -0.313926000 |
| 13 | -0.436060000 | -0.853885000 | 0.297657000  |
| 6  | 3.643768000  | -0.224179000 | -3.043325000 |
| 6  | 2.957193000  | 0.116546000  | -1.880972000 |
| 6  | 3.501936000  | 1.029136000  | -0.977612000 |
| 6  | 4.735775000  | 1.595044000  | -1.244239000 |
| 6  | 5.418036000  | 1.260477000  | -2.410148000 |
| 6  | 4.872960000  | 0.355401000  | -3.312372000 |
| 1  | 3.210163000  | -0.935986000 | -3.735739000 |
| 1  | 2.957090000  | 1.267716000  | -0.072546000 |
| 1  | 5.169229000  | 2.296374000  | -0.544400000 |
| 1  | 6.381195000  | 1.707165000  | -2.615902000 |
| 1  | 5.406794000  | 0.103024000  | -4.217493000 |
| 6  | 1.672298000  | -0.507614000 | -1.585304000 |

|   |              |              |              |
|---|--------------|--------------|--------------|
| 1 | 1.327305000  | -1.309001000 | -2.246841000 |
| 8 | 0.876848000  | 0.018343000  | -0.785791000 |
| 6 | 1.134714000  | 3.546055000  | -0.004682000 |
| 6 | 2.354180000  | 4.106699000  | 0.347130000  |
| 6 | 2.998809000  | 3.701773000  | 1.507901000  |
| 6 | 2.425652000  | 2.731661000  | 2.321123000  |
| 6 | 1.202268000  | 2.174892000  | 1.982426000  |
| 6 | 0.565557000  | 2.579692000  | 0.814987000  |
| 1 | 0.649833000  | 3.833954000  | -0.926469000 |
| 1 | 2.804722000  | 4.852142000  | -0.293091000 |
| 1 | 3.948747000  | 4.141510000  | 1.779401000  |
| 1 | 2.929443000  | 2.405468000  | 3.220275000  |
| 1 | 0.754187000  | 1.413663000  | 2.604172000  |
| 6 | -0.759583000 | 1.947862000  | 0.475912000  |
| 8 | -1.069432000 | 0.756937000  | 0.885068000  |
| 8 | -1.122522000 | 2.219398000  | -0.923874000 |
| 6 | -2.149861000 | 2.935473000  | -0.439940000 |
| 1 | -1.560125000 | 2.704430000  | 0.986734000  |
| 1 | -1.985980000 | 4.010487000  | -0.333756000 |
| 6 | -3.489391000 | 2.426803000  | -0.447955000 |
| 6 | -4.529598000 | 3.247919000  | 0.012634000  |
| 6 | -3.750499000 | 1.138567000  | -0.930731000 |
| 6 | -5.823682000 | 2.773656000  | 0.000325000  |
| 1 | -4.311629000 | 4.245685000  | 0.372964000  |
| 6 | -5.053800000 | 0.677039000  | -0.946153000 |
| 1 | -2.939227000 | 0.524898000  | -1.296416000 |
| 6 | -6.080940000 | 1.489563000  | -0.478390000 |
| 1 | -6.634927000 | 3.394221000  | 0.352184000  |
| 1 | -5.263757000 | -0.313624000 | -1.324064000 |
| 1 | -7.098975000 | 1.124202000  | -0.493273000 |

## INT-2

**ETOTAL = -2009.545530 a.u.**

|   |              |             |              |
|---|--------------|-------------|--------------|
| 6 | -0.002287000 | 2.599209000 | -0.258374000 |
| 6 | 1.142248000  | 3.209592000 | 0.241876000  |



|    |              |              |              |
|----|--------------|--------------|--------------|
| 6  | 1.493364000  | 4.529439000  | -0.008224000 |
| 1  | 2.397143000  | 4.966221000  | 0.398199000  |
| 6  | 0.638723000  | 5.282852000  | -0.797727000 |
| 1  | 0.876319000  | 6.315042000  | -1.015144000 |
| 6  | -0.530371000 | 4.718902000  | -1.304536000 |
| 1  | -1.192584000 | 5.324093000  | -1.909084000 |
| 6  | -0.846504000 | 3.393838000  | -1.039088000 |
| 1  | -1.758971000 | 2.984274000  | -1.458861000 |
| 6  | 3.303761000  | 2.132441000  | 0.627912000  |
| 1  | 3.764978000  | 1.307393000  | 1.171141000  |
| 1  | 3.320396000  | 1.913816000  | -0.438459000 |
| 1  | 3.890603000  | 3.037939000  | 0.801553000  |
| 6  | 1.903396000  | 2.738417000  | 2.490809000  |
| 1  | 2.432992000  | 2.012394000  | 3.103662000  |
| 1  | 2.382310000  | 3.715492000  | 2.591432000  |
| 1  | 0.875807000  | 2.802616000  | 2.841423000  |
| 6  | -0.010416000 | 0.093989000  | 2.330627000  |
| 6  | -1.291041000 | -0.167912000 | 2.854987000  |
| 6  | -1.446518000 | -0.989247000 | 3.972613000  |
| 1  | -2.427064000 | -1.203024000 | 4.370891000  |
| 6  | -0.338261000 | -1.531239000 | 4.608146000  |
| 1  | -0.477997000 | -2.155695000 | 5.480039000  |
| 6  | 0.935592000  | -1.257429000 | 4.140382000  |
| 1  | 1.803757000  | -1.662976000 | 4.642242000  |
| 6  | 1.076408000  | -0.458374000 | 3.012431000  |
| 1  | 2.081999000  | -0.273080000 | 2.641042000  |
| 6  | -3.723208000 | -0.140552000 | 2.574573000  |
| 1  | -4.482210000 | 0.284009000  | 1.918389000  |
| 1  | -3.718163000 | -1.221017000 | 2.438408000  |
| 1  | -4.005654000 | 0.092309000  | 3.607865000  |
| 6  | -2.475059000 | 1.878520000  | 2.308268000  |
| 1  | -3.225954000 | 2.264213000  | 1.616157000  |
| 1  | -2.742786000 | 2.199652000  | 3.322079000  |
| 1  | -1.515674000 | 2.315622000  | 2.048133000  |
| 7  | 1.916800000  | 2.296095000  | 1.083632000  |
| 7  | -2.429535000 | 0.418370000  | 2.213109000  |
| 13 | 0.340889000  | 0.825967000  | 0.539187000  |

|   |              |              |              |
|---|--------------|--------------|--------------|
| 6 | -4.491191000 | -0.605673000 | -0.737921000 |
| 6 | -3.195211000 | -1.035292000 | -0.463013000 |
| 6 | -2.910124000 | -2.394755000 | -0.333702000 |
| 6 | -3.927514000 | -3.318682000 | -0.482217000 |
| 6 | -5.221703000 | -2.888312000 | -0.764877000 |
| 6 | -5.506511000 | -1.534834000 | -0.894242000 |
| 1 | -4.695880000 | 0.454260000  | -0.834411000 |
| 1 | -1.896085000 | -2.701045000 | -0.114793000 |
| 1 | -3.721803000 | -4.374689000 | -0.378255000 |
| 1 | -6.013601000 | -3.615415000 | -0.882143000 |
| 1 | -6.513779000 | -1.210232000 | -1.112903000 |
| 6 | -2.142909000 | -0.045957000 | -0.312144000 |
| 1 | -2.432591000 | 1.010108000  | -0.342766000 |
| 8 | -0.944430000 | -0.348733000 | -0.259647000 |
| 6 | 4.427604000  | -2.244293000 | -1.358168000 |
| 6 | 5.207375000  | -3.294346000 | -0.908693000 |
| 6 | 4.908085000  | -3.914244000 | 0.299084000  |
| 6 | 3.828808000  | -3.488993000 | 1.064210000  |
| 6 | 3.048852000  | -2.433044000 | 0.628698000  |
| 6 | 3.352231000  | -1.809955000 | -0.581974000 |
| 1 | 4.648260000  | -1.756715000 | -2.296505000 |
| 1 | 6.047155000  | -3.632766000 | -1.498332000 |
| 1 | 5.518650000  | -4.737586000 | 0.643716000  |
| 1 | 3.594948000  | -3.982516000 | 1.996711000  |
| 1 | 2.198252000  | -2.098858000 | 1.207079000  |
| 6 | 2.506369000  | -0.699395000 | -1.026560000 |
| 8 | 1.666194000  | -0.176378000 | -0.288673000 |
| 8 | 2.703077000  | -0.299479000 | -2.252661000 |
| 6 | 1.812555000  | 0.678849000  | -2.828409000 |
| 1 | 1.741520000  | 1.543485000  | -2.165949000 |
| 1 | 2.315122000  | 0.975700000  | -3.745734000 |
| 6 | 0.446108000  | 0.107434000  | -3.103276000 |
| 6 | 0.198392000  | -1.258697000 | -3.106574000 |
| 6 | -0.589482000 | 0.993384000  | -3.377372000 |
| 6 | -1.080007000 | -1.734212000 | -3.366073000 |
| 1 | 0.997916000  | -1.962260000 | -2.912714000 |
| 6 | -1.865854000 | 0.517571000  | -3.637496000 |

|   |              |              |              |
|---|--------------|--------------|--------------|
| 1 | -0.395187000 | 2.058289000  | -3.383970000 |
| 6 | -2.114397000 | -0.849445000 | -3.627860000 |
| 1 | -1.265911000 | -2.799322000 | -3.365335000 |
| 1 | -2.664689000 | 1.213682000  | -3.856721000 |
| 1 | -3.110491000 | -1.222865000 | -3.823420000 |

## References:

- [1] R. J. Errington, "Advanced practical inorganic and metal organic chemistry" **1997**, Blackie academic & professional, London.
- [2] W. F. Armarego, C. L. L. Chai, "Purification of laboratory chemicals" **2013**, Elsevier, UK
- [3] D. W. Slocum, T. K. Reinscheld, C. B. White, M. D. Timmons, P. A. Shelton, M. G. Slocum, R. D. Sandlin, E. G. Holland, D. Kusmic, J. A. Jennings, K. C. Tekin, Q. Nguyen, S. J. Bush, J. M. Keller, P. E. Whitley, *Organometallics* **2013**, 32, 1674-1686.
- [4] A. S. Weller. et al., *Tetrahedron Lett.* **2003**, 44, 7329-7331 and *Eur. J. Inorg. Chem.* **2010**, 5124.
- [5] Frisch, M. J.; Trucks, G. W.; Schlegel, H. B.; Scuseria, G. E.; Robb, M. A.; Cheeseman, J. R.; Scalmani, G.; Barone, V.; Mennucci, B.; Petersson, G. A.; Nakatsuji, H.; Caricato, M.; Li, X.; Hratchian, H. P.; Izmaylov, A. F.; Bloino, J.; Zheng, G.; Sonnenberg, J. L.; Hada, M.; Ehara, M.; Toyota, K.; Fukuda, R.; Hasegawa, J.; Ishida, M.; Nakajima, T.; Honda, Y.; Kitao, O.; Nakai, H.; Vreven, T.; Montgomery Jr., J. A.; Peralta, J. E.; Ogliaro, F.; Bearpark, M. J.; Heyd, J.; Brothers, E. N.; Kudin, K. N.; Staroverov, V. N.; Kobayashi, R.; Normand, J.; Raghavachari, K.; Rendell, A. P.; Burant, J. C.; Iyengar, S. S.; Tomasi, J.; Cossi, M.; Rega, N.; Millam, N. J.; Klene, M.; Knox, J. E.; Cross, J. B.; Bakken, V.; Adamo, C.; Jaramillo, J.; Gomperts, R.; Stratmann, R. E.; Yazyev, O.; Austin, A. J.; Cammi, R.; Pomelli, C.; Ochterski, J. W.; Martin, R. L.; Morokuma, K.; Zakrzewski, V. G.; Voth, G. A.; Salvador, P.; Dannenberg, J. J.; Dapprich, S.; Daniels, A. D.; Farkas, Ö.; Foresman, J. B.; Ortiz, J. V.; Cioslowski, J.; Fox, D. J. *Gaussian 09*, Gaussian, Inc.: Wallingford, CT, USA, 2009.
- [6] Y. Zhao and D. G. Truhlar, *Theor. Chem. Acc.* **2008**, 120, 215 – 241.
- [7] T. H. Dunning, *The Journal of Chemical Physics* **1989**, 90 (2), 1007-1023.
- [8] (a) F. Weinhold, "Natural bond orbital analysis: A critical overview of relationships to alternative bonding perspectives" *Journal of Computational Chemistry* **2012**, 33 (30), 2363-2379; (b) E. D. Glendening, C. R. Landis, F. Weinhold, "NBO 6.0: Natural bond orbital analysis program" *Journal of Computational Chemistry* **2013**, 34 (16), 1429-1437.
